# Supplementary material for: Complex amorphous oxides: property prediction from high throughput DFT and AI for new material search
Source: Royal Society of Chemistry journal article supplement (doi:10.1039/d2ma00759b), 2022-01-01
Supplement: d2ma00759b2.pdf [file d2ma00759b2.pdf]

In [1]:

```
import re
import json
import os
import datetime
import pickle
from itertools import product
from cycler import cycler
import pandas as pd
import numpy as np
import matplotlib.pyplot as plt
import matplotlib
from sklearn.linear_model import LinearRegression, Ridge, BayesianRidge
from sklearn.kernel_ridge import KernelRidge
from sklearn.neighbors import KNeighborsRegressor
from sklearn.gaussian_process import GaussianProcessRegressor
from sklearn.svm import SVR
from sklearn.naive_bayes import GaussianNB, BernoulliNB
from sklearn.ensemble import RandomForestRegressor, GradientBoostingRegressor
from scipy.stats import pearsonr
from scipy.optimize import minimize, Bounds, NonlinearConstraint
from itertools import combinations

ELEMS = ['Ag', 'Al', 'Cd', 'Ga', 'In', 'Mg', 'Sb', 'Sn', 'Si', 'Ti', 'Zn', 'Zr']

pd.set_option('display.max_rows', 500)
%matplotlib notebook
```

In [2]:

```
def composition_string_to_vector(name, get_max_el=False):
    elems = ELEMS + ['O']
    vec = [0]*len(elems)
    reg_exp = re.compile("[a-zA-Z]+([0-9]+)")
    res = reg_exp.findall(name)
    for group in res:
        vec[elems.index(group[0])] = int(group[1])
    vec = vec[:-1]
    if get_max_el:
        return elems[vec.index(max(vec))]
    vec = np.array(vec) / sum(vec)
    return vec

def get_model(df, key, model, direct=False, for_cv=False, **kwargs):
    if not direct:
        model = model(**kwargs)
        name = str(model.__class__).split('.')[0].replace('>', '').replace('"', '')
        model.fit(list(df['descriptor']), df[key])

    if for_cv:
        return model

    data_org = df[key]
    data_predicted = model.predict(list(df['descriptor']))
    diff = abs(data_predicted - data_org)
    max_val = max(max(data_org), max(data_predicted))
    min_val = min(min(data_org), min(data_predicted))
    corr, _ = pearsonr(data_org, data_predicted)

    fig, ax = plt.subplots()
    ax.plot([min_val, max_val], [min_val, max_val], c='red')
```

```

ax.scatter(data_org, data_predicted, s=1)

key_name = key.replace('_', ' ').replace('iswo', 'ISW0').replace('val', 'Valence')
key_name = key_name.replace('dissociation', 'formation')
title = f"{name} model for {key_name}"
ax.set_title(title, size=14)
ax.set_xlabel('Original Data', size=12)
ax.set_ylabel('Predicted Data', size=12)
fig = ax.get_figure()
fig.savefig(title.replace(' ', '_') + '.eps')
print(f'Mean Absolute deviation: {np.mean(diff):2.3f}')
print(f'Pearsons correlation: {corr:0.3f}')
print(f"R2: {model.score(list(df['descriptor']), df[key]):0.3f}")
return model

```

## Load the dataframe with all data on the 200 atom systems

```
In [3]: df = pd.read_json('full_200_dataframe.json')
df
```

```
Out[3]:
```

|                           | Ag       | Al  | Ba  | Ca  | Cd       | Ga       | Ge  | Hf  | In       | Mg       | ... |
|---------------------------|----------|-----|-----|-----|----------|----------|-----|-----|----------|----------|-----|
| <b>Mg40Si40O120-8</b>     | 0.000000 | 0.0 | 0.0 | 0.0 | 0.000000 | 0.000000 | 0.0 | NaN | 0.000000 | 0.500000 | ... |
| <b>Mg29Ga57O114-7</b>     | 0.000000 | 0.0 | 0.0 | 0.0 | 0.000000 | 0.662791 | 0.0 | NaN | 0.000000 | 0.337209 | ... |
| <b>Ag56Sn28O112-3</b>     | 0.666667 | 0.0 | 0.0 | 0.0 | 0.000000 | 0.000000 | 0.0 | NaN | 0.000000 | 0.000000 | ... |
| <b>Ag80O120-1</b>         | 1.000000 | 0.0 | 0.0 | 0.0 | 0.000000 | 0.000000 | 0.0 | NaN | 0.000000 | 0.000000 | ... |
| <b>Zn40Sn40O120-3</b>     | 0.000000 | 0.0 | 0.0 | 0.0 | 0.000000 | 0.000000 | 0.0 | NaN | 0.000000 | 0.000000 | ... |
| ...                       | ...      | ... | ... | ... | ...      | ...      | ... | ... | ...      | ...      | ... |
| <b>Si5Sb50O135-9.cif</b>  | NaN      | NaN | NaN | NaN | NaN      | NaN      | NaN | NaN | NaN      | NaN      | ... |
| <b>In14Ag70O126-5.cif</b> | 0.833333 | NaN | NaN | NaN | NaN      | NaN      | NaN | NaN | 0.166667 | NaN      | ... |
| <b>Cd50Ga20O130-7.cif</b> | NaN      | NaN | NaN | NaN | 0.714286 | 0.285714 | NaN | NaN | NaN      | NaN      | ... |
| <b>Ti60Cd30O126-8.cif</b> | NaN      | NaN | NaN | NaN | 0.047619 | NaN      | NaN | NaN | NaN      | NaN      | ... |
| <b>Ga60Sn30O126-8.cif</b> | NaN      | NaN | NaN | NaN | NaN      | 0.666667 | NaN | NaN | NaN      | NaN      | ... |

4648 rows × 49 columns

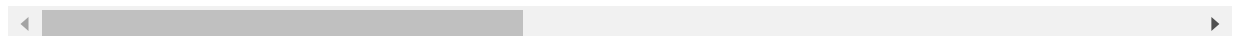

## Reduce to 3 most stable and add descriptor and main element

```
In [4]: groups = []

for name, group in df.groupby('composition'):
    std = group['total_energy'].std()
    group = group.sort_values(by='total_energy').head(3)
    groups.append(group)

df = pd.concat(groups)

df['descriptor'] = [composition_string_to_vector(i) for i in df.index]

main_elements = []
for entry in df.itertuples():
    main_elements.append(composition_string_to_vector(entry.composition, get_max_el=

df['main_elements'] = main_elements
df
```

Out[4]:

|                           | Ag       | Al  | Ba  | Ca  | Cd  | Ga  | Ge  | Hf  | In  | Mg  | ... | skip_val | std_i |
|---------------------------|----------|-----|-----|-----|-----|-----|-----|-----|-----|-----|-----|----------|-------|
| <b>Ag10Sb50O140-5.cif</b> | 0.166667 | 0.0 | 0.0 | 0.0 | 0.0 | 0.0 | 0.0 | NaN | 0.0 | 0.0 | ... | 4.0      |       |
| <b>Ag10Sb50O140-2.cif</b> | 0.166667 | NaN | ... | 1.0      |       |
| <b>Ag10Sb50O140-1.cif</b> | 0.166667 | NaN | ... | 3.0      |       |
| <b>Ag16Sn80O104-5</b>     | 0.166667 | 0.0 | 0.0 | 0.0 | 0.0 | 0.0 | 0.0 | NaN | 0.0 | 0.0 | ... | 6.0      |       |
| <b>Ag16Sn80O104-7</b>     | 0.166667 | 0.0 | 0.0 | 0.0 | 0.0 | 0.0 | 0.0 | NaN | 0.0 | 0.0 | ... | 2.0      |       |
| ...                       | ...      | ... | ... | ... | ... | ... | ... | ... | ... | ... | ... | ...      |       |
| <b>Zr9Sn90O108-8</b>      | 0.000000 | 0.0 | 0.0 | 0.0 | 0.0 | 0.0 | 0.0 | NaN | 0.0 | 0.0 | ... | 2.0      |       |
| <b>Zr9Sn90O108-5</b>      | 0.000000 | 0.0 | 0.0 | 0.0 | 0.0 | 0.0 | 0.0 | NaN | 0.0 | 0.0 | ... | 3.0      |       |
| <b>Zr9Zn90O108-4</b>      | 0.000000 | 0.0 | 0.0 | 0.0 | 0.0 | 0.0 | 0.0 | NaN | 0.0 | 0.0 | ... | 3.0      |       |
| <b>Zr9Zn90O108-7</b>      | 0.000000 | 0.0 | 0.0 | 0.0 | 0.0 | 0.0 | 0.0 | NaN | 0.0 | 0.0 | ... | 4.0      |       |
| <b>Zr9Zn90O108-2</b>      | 0.000000 | 0.0 | 0.0 | 0.0 | 0.0 | 0.0 | 0.0 | NaN | 0.0 | 0.0 | ... | 7.0      |       |

1434 rows × 51 columns

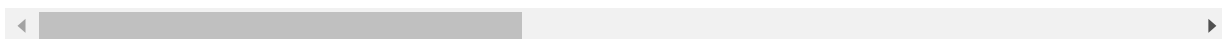

```
In [5]: df.describe()
```

Out[5]:

|              | Ag          | Al          | Ba     | Ca     | Cd          | Ga          | Ge     | Hf  | ...         | Li |
|--------------|-------------|-------------|--------|--------|-------------|-------------|--------|-----|-------------|----|
| <b>count</b> | 1260.000000 | 1258.000000 | 1222.0 | 1222.0 | 1255.000000 | 1260.000000 | 1222.0 | 0.0 | 1258.000000 |    |
| <b>mean</b>  | 0.105044    | 0.099009    | 0.0    | 0.0    | 0.085841    | 0.100456    | 0.0    | NaN | 0.10043     |    |
| <b>std</b>   | 0.269985    | 0.262365    | 0.0    | 0.0    | 0.242851    | 0.261704    | 0.0    | NaN | 0.26459     |    |

|            | Ag       | Al       | Ba  | Ca  | Cd       | Ga       | Ge  | Hf  | Li      |
|------------|----------|----------|-----|-----|----------|----------|-----|-----|---------|
| <b>min</b> | 0.000000 | 0.000000 | 0.0 | 0.0 | 0.000000 | 0.000000 | 0.0 | NaN | 0.00000 |
| <b>25%</b> | 0.000000 | 0.000000 | 0.0 | 0.0 | 0.000000 | 0.000000 | 0.0 | NaN | 0.00000 |
| <b>50%</b> | 0.000000 | 0.000000 | 0.0 | 0.0 | 0.000000 | 0.000000 | 0.0 | NaN | 0.00000 |
| <b>75%</b> | 0.000000 | 0.000000 | 0.0 | 0.0 | 0.000000 | 0.000000 | 0.0 | NaN | 0.00000 |
| <b>max</b> | 1.000000 | 1.000000 | 0.0 | 0.0 | 1.000000 | 1.000000 | 0.0 | NaN | 1.00000 |

8 rows × 44 columns

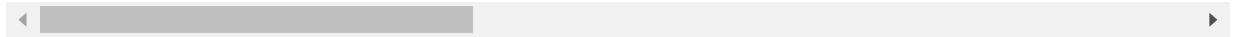

## Exploring data

In [6]:

```
fig, ax = plt.subplots()

figure = ax.scatter(df['transport_gap']-2.2, df['mean_iswo_cond'], s=2, c=df['skip_c']
ax.set_xlabel(r'$Gap - Gap_{\mathrm{IGZO}}$ (eV)')
ax.set_ylabel(r'$ISWO\text{Conduction} - E_{\mathrm{form, IGZO}}$ (eV)')
cb = plt.colorbar(figure)
cb.set_label('conduction defect states')
```

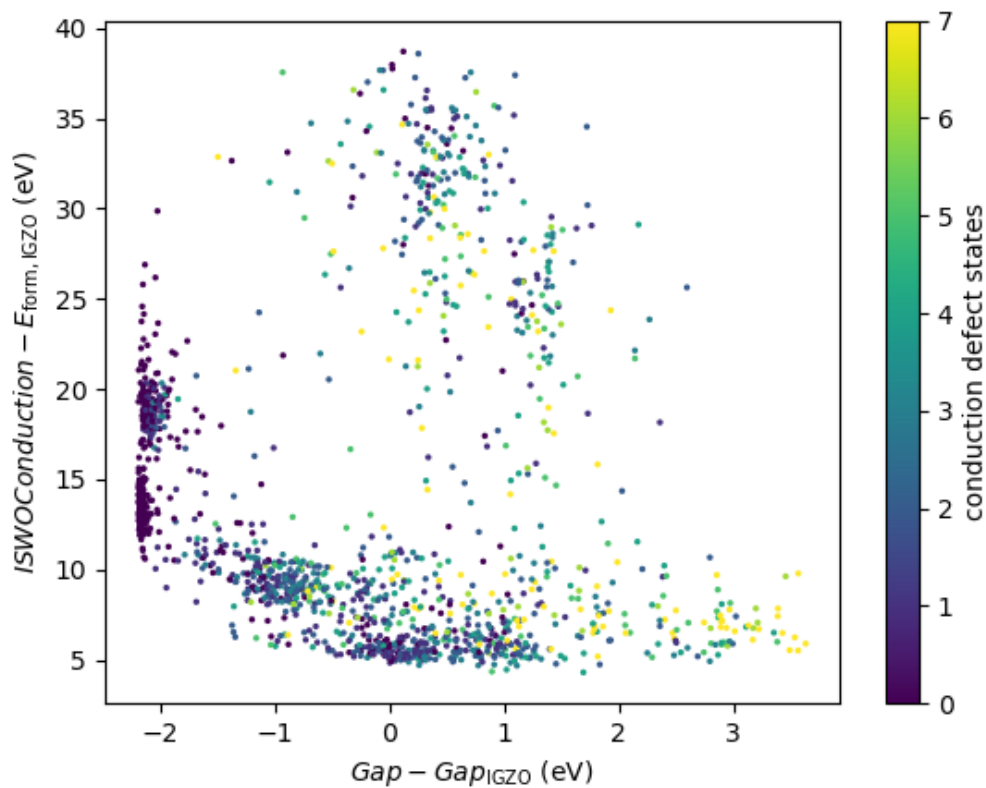

In [7]:

```
fig, ax = plt.subplots()

figure = ax.scatter(df['transport_gap']-2.2, df['mean_iswo_cond'] - 6.0, s=3, c=df['
ax.set_xlabel(r'$\Delta$ Band Gap (eV w.r.t IGZO)', size=12)
ax.set_ylabel(r'$\Delta$ ISWO$C$ (w.r.t IGZO)', size=12)
ax.grid()
```

```

cb = plt.colorbar.figure, cmap='jet')
cb.set_label(r'$E_{\mathrm{f}}$ (eV w.r.t IGZO)', size=12)

plt.tight_layout()
fig.savefig('training_set_energy.eps')
fig.savefig('training_set_energy.jpeg')

```

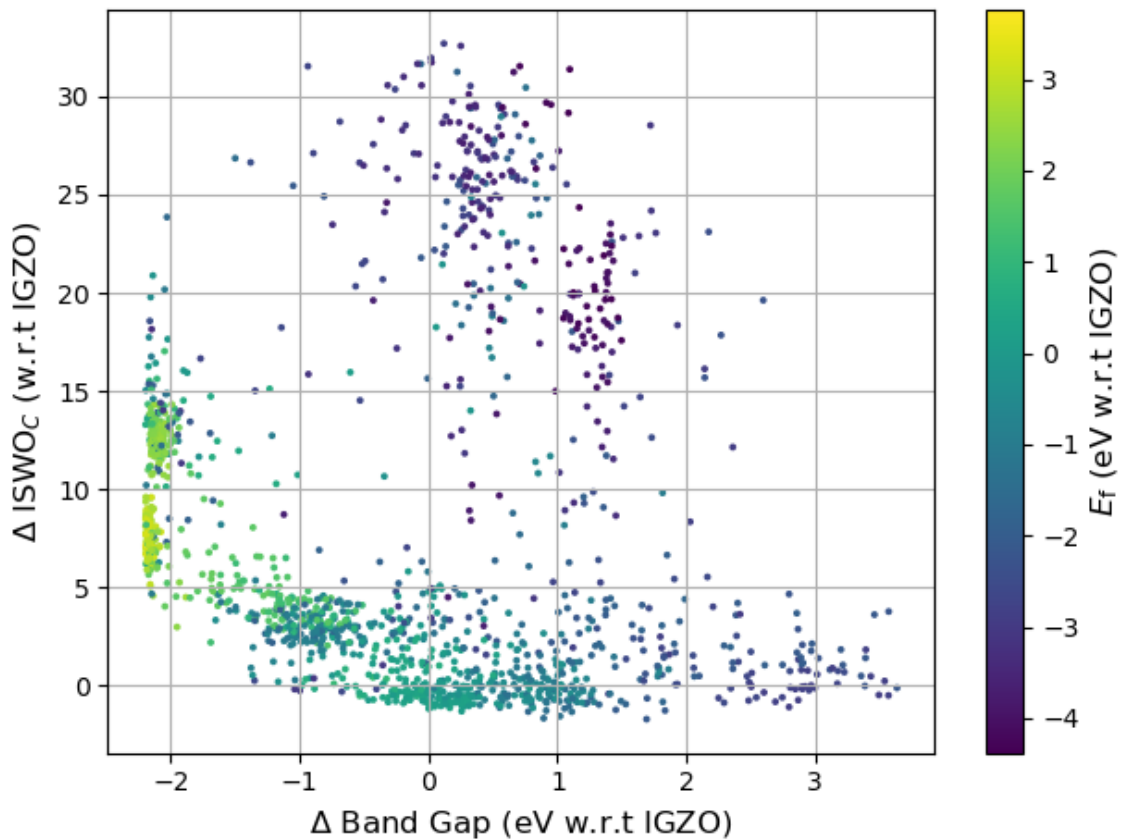

In [8]:

```

fig, ax = plt.subplots()

figure = ax.scatter(df['transport_gap']-2.2, df['mean_iswo_val'] - 6.0, s=3, c=df['d
ax.set_xlabel(r'$\Delta$ Band Gap (eV w.r.t IGZO)', size=12)
ax.set_ylabel(r'$\Delta$ ISWOC (w.r.t IGZO conduction)', size=12)
ax.grid()
cb = plt.colorbar.figure, cmap='jet')
cb.set_label(r'$E_{\mathrm{f}}$ (eV w.r.t IGZO)', size=12)

plt.tight_layout()
fig.savefig('training_set_energy.eps')
fig.savefig('training_set_energy.jpeg')

```

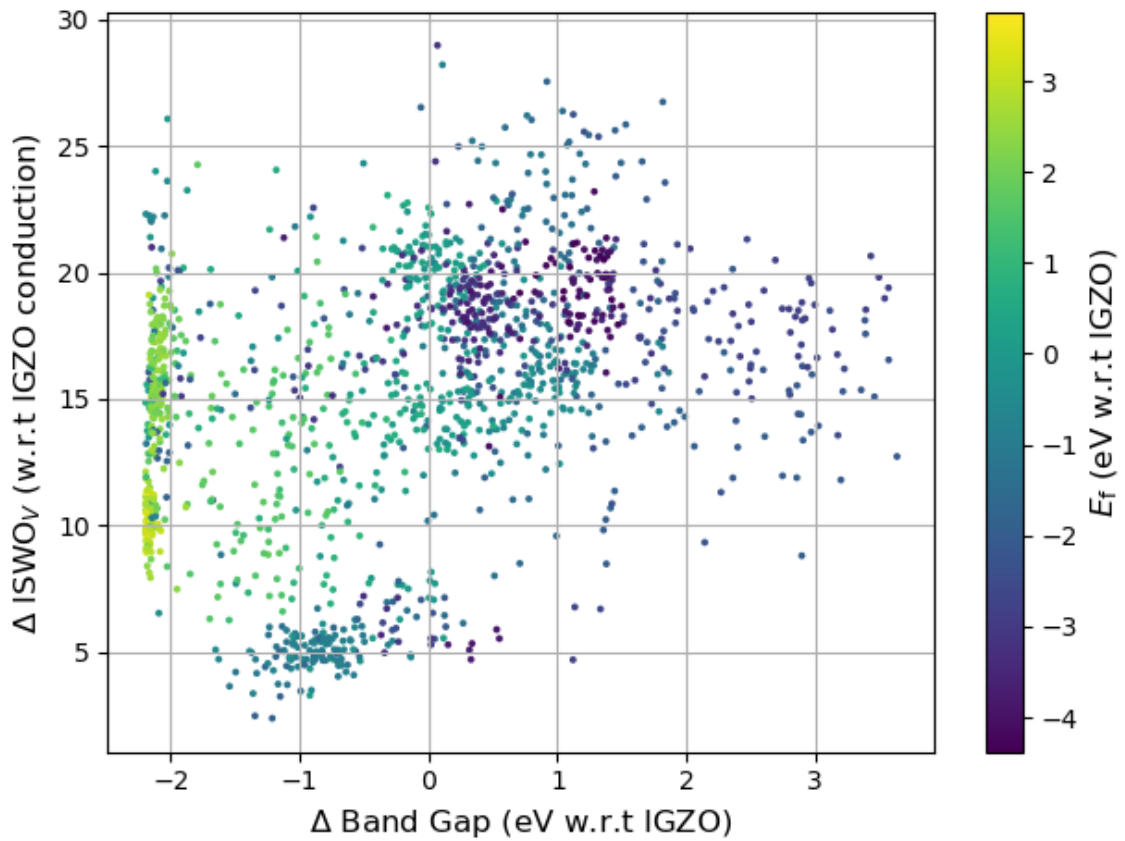

In [9]:

```

fig, ax = plt.subplots()

figure = ax.scatter(df['mean_iswo_val']-6.0, df['mean_iswo_cond'] - 6.0, s=3, c=df['
ax.set_xlabel(r'$\Delta$ ISWO_V$ (w.r.t IGZO conduction)', size=12)
ax.set_ylabel(r'$\Delta$ ISWO_C$ (w.r.t IGZO conduction)', size=12)
ax.grid()
cb = plt.colorbar(figure, cmap='jet')
cb.set_label(r'$\Delta$ Band Gap (eV w.r.t IGZO)', size=12)

plt.tight_layout()
fig.savefig('training_set_energy.eps')
fig.savefig('training_set_energy.jpeg')

```

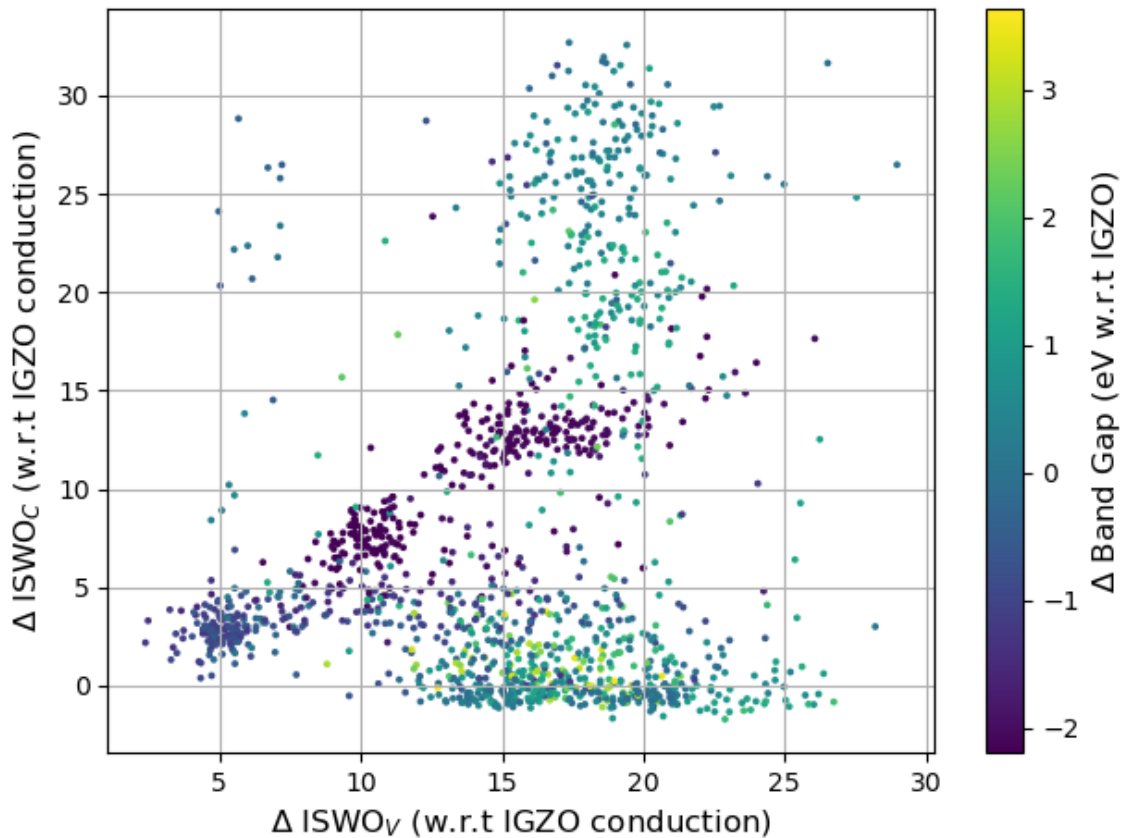

In [10]:

```
fig, ax = plt.subplots()

colors = ['#7f0000', '#e6bfac', '#d9d900', '#37a600', '#00cccc', '#acd2e6', '#524359',
          '#ff8080', '#ffaa00', '#bfbf00', '#134d13', '#008080', '#001540', '#800080',
          '#734d00', '#7f8020', '#ace6bf', '#004040', '#202080', '#4d134d', '#ff5500']

custom_cycler = cycler(color=colors)
ax.set_prop_cycle(custom_cycler)

for name, group in df.groupby(by='main_elements'):
    ax.scatter(group['transport_gap']-2.2, group['mean_iswo_val'] - 6.0, s=3, label=name)
    ax.set_xlabel(r'$\Delta$ Band Gap (eV w.r.t IGZO)', size=12)
    ax.set_ylabel(r'$\Delta$ ISWO_V$ (w.r.t IGZO conduction)', size=12)

ax.grid()

legend = ax.legend(loc="right", bbox_to_anchor=(1.2, 0.5), ncol=1)

for hh in legend.legendHandles:
    hh._sizes = [30]
plt.tight_layout()
fig.savefig('training_set_composition.eps')
```

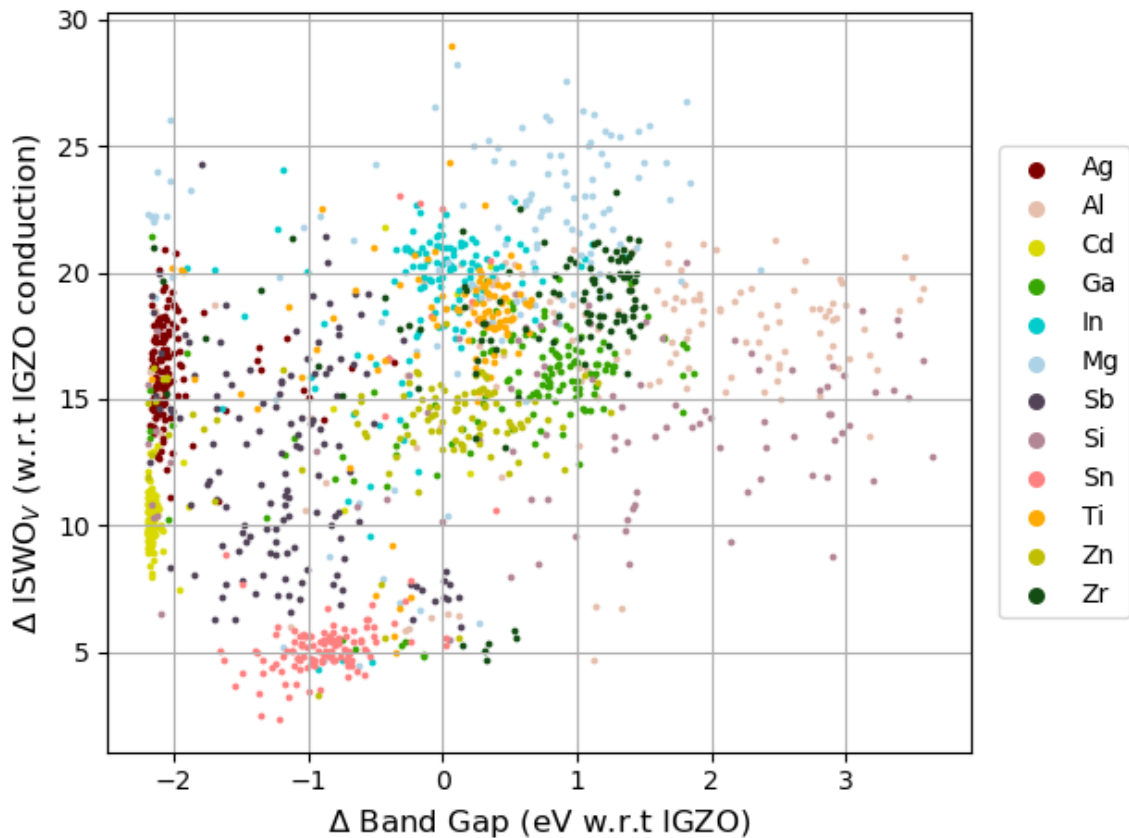

The PostScript backend does not support transparency; partially transparent artists will be rendered opaque.

```
In [11]: fig, ax = plt.subplots()

from cycler import cycler

colors = ['#7f0000', '#e6bfac', '#d9d900', '#37a600', '#00cccc', '#acd2e6', '#524359',
          '#ff8080', '#ffaa00', '#bfbf00', '#134d13', '#008080', '#001540', '#800080',
          '#734d00', '#7f8020', '#ace6bf', '#004040', '#202080', '#4d134d', '#ff5500']

custom_cycler = cycler(color=colors)
ax.set_prop_cycle(custom_cycler)

for name, group in df.groupby(by='main_elements'):
    ax.scatter(group['mean_iswo_val']-6.0, group['mean_iswo_cond'] - 6.0, s=3, label=name)
ax.set_xlabel(r'$\Delta$ ISWO_V (w.r.t IGZO conduction)', size=12)
ax.set_ylabel(r'$\Delta$ ISWO_C (w.r.t IGZO conduction)', size=12)

ax.grid()

legend = ax.legend(loc="right", bbox_to_anchor=(1.2, 0.5), ncol=1)

for hh in legend.legendHandles:
    hh._sizes = [30]
plt.tight_layout()
fig.savefig('training_set_composition.eps')
```



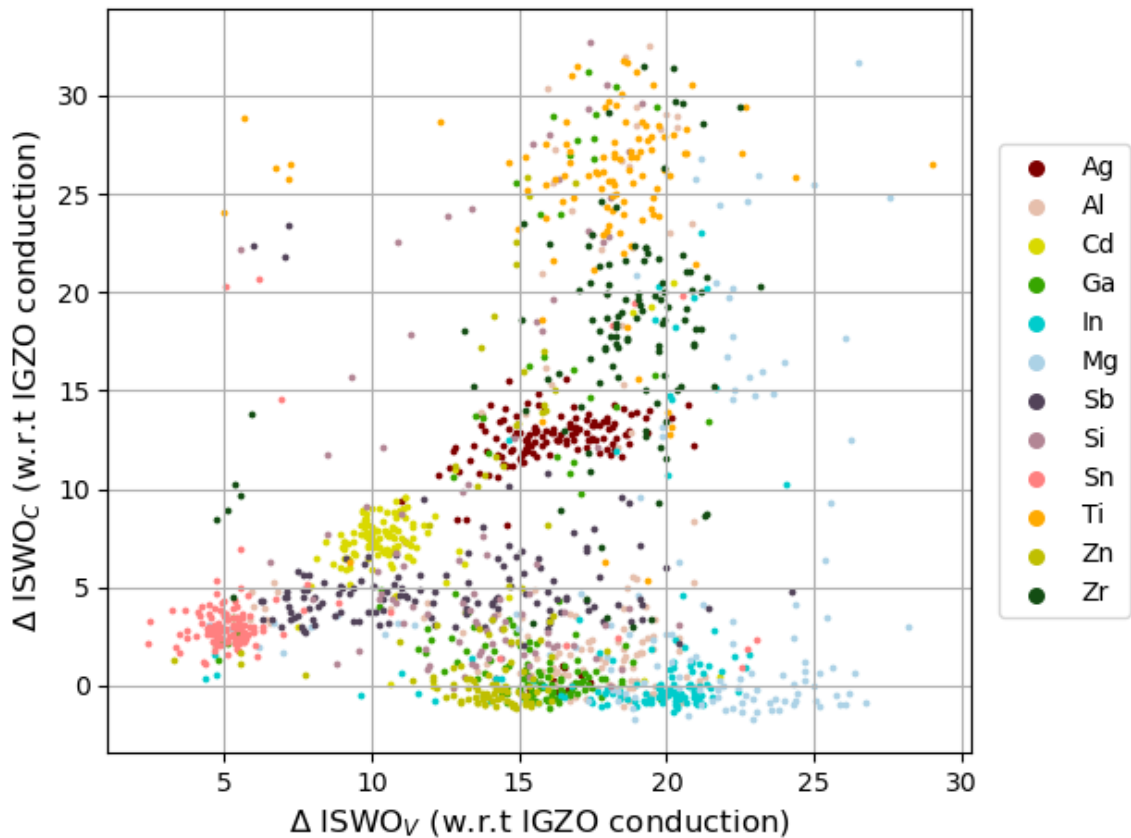

The PostScript backend does not support transparency; partially transparent artists will be rendered opaque.

In [12]:

```
fig, ax = plt.subplots()
x = 0.25
df_ti = df[df['Ti'] > x]
df_zr = df[df['Zr'] > x]
df_s = df[df['Ti'] < x]
df_s = df_s[df['Zr'] < x]

ax.scatter(df_ti['transport_gap']-2.2, df_ti['dissociation_energy_per_0'], s=2, c='t')
ax.scatter(df_zr['transport_gap']-2.2, df_zr['dissociation_energy_per_0'], s=2, c='t')
ax.scatter(df_s['transport_gap']-2.2, df_s['dissociation_energy_per_0'], s=2, c='tab')
ax.set_xlabel(r'$Gap - Gap_{\mathrm{IGZO}}$ (eV)')
ax.set_ylabel(r'$E_{\mathrm{form}} - E_{\mathrm{form, IGZO}}$ (eV)')
legend = ax.legend()
for hh in legend.legendHandles:
    hh._sizes = [30]
plt.tight_layout()
```

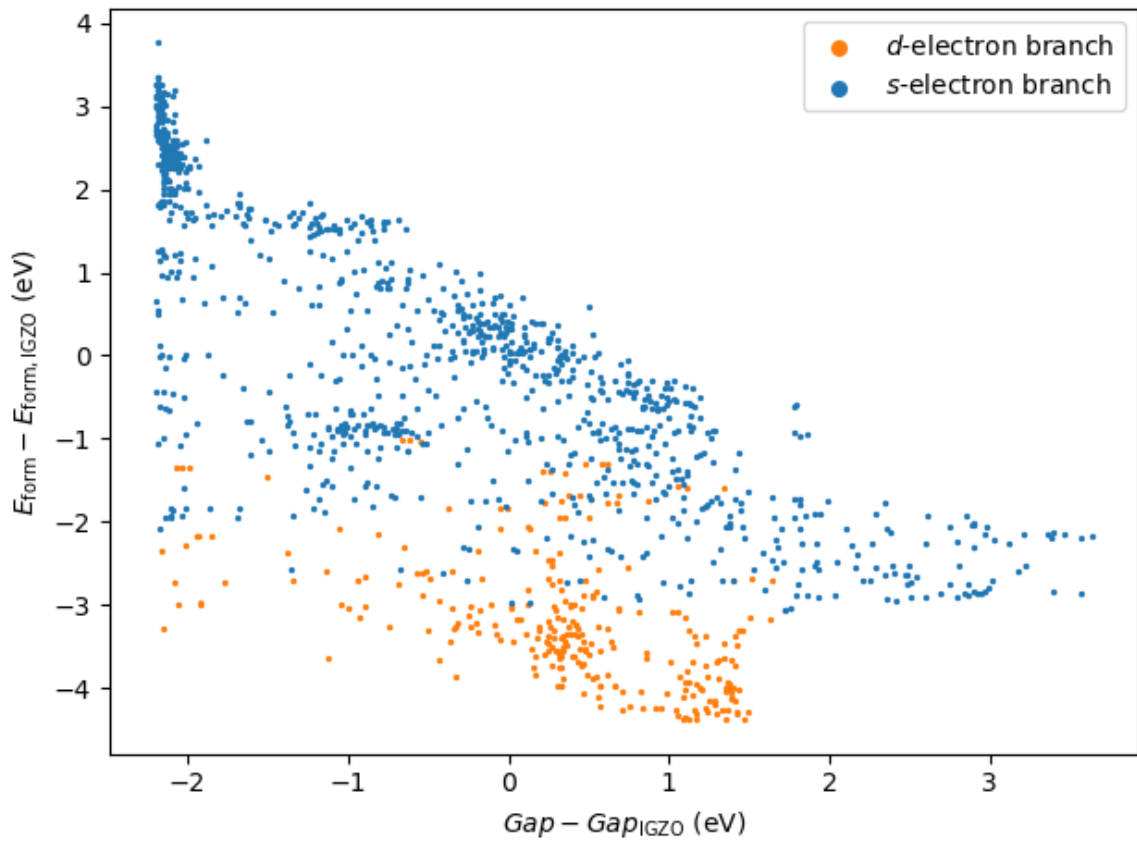

/home/vsette63/anaconda3/envs/2022.4/lib/python3.7/site-packages/ipykernel\_launcher.py:6: UserWarning: Boolean Series key will be reindexed to match DataFrame index.

```
In [13]: fig, ax = plt.subplots()

figure = ax.scatter(df['transport_gap']-2.2, df['dissociation_energy_per_0'], s=2, c
ax.set_xlabel(r'$Gap - Gap_{\mathrm{IGZO}}$ (eV)')
ax.set_ylabel(r'$E_{\mathrm{form}} - E_{\mathrm{form, IGZO}}$ (eV)')
cb = plt.colorbar(figure)
cb.set_label('ISWO cond')
```

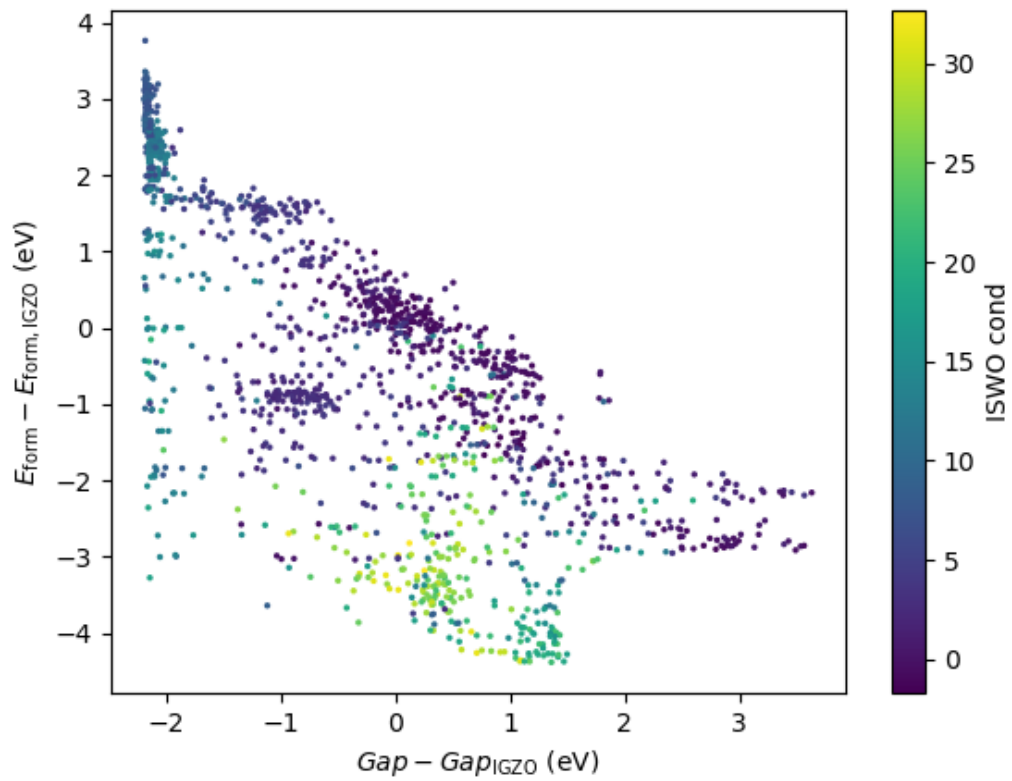

## linear model

```
In [14]: gap_model = get_model(df, 'transport_gap', LinearRegression)
```

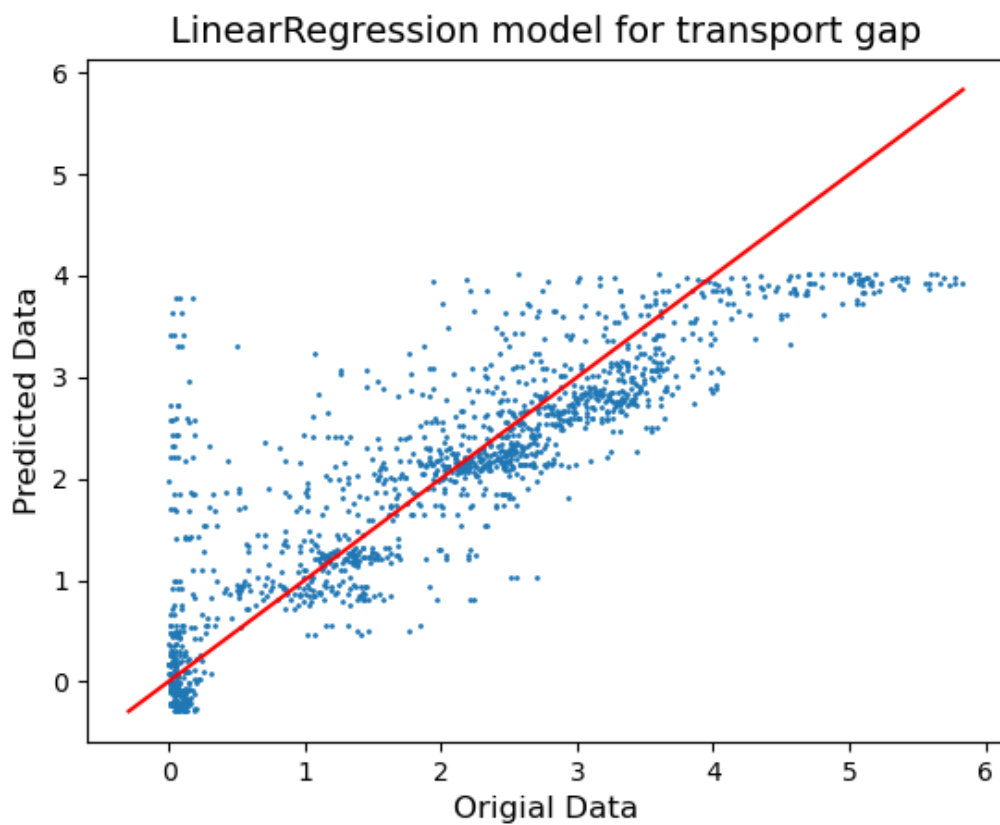

Mean Absolute diviation: 0.486  
Pearsons correlation: 0.858  
R2: 0.736

In [15]:

```
iswo_val_model = get_model(df, 'mean_iswo_val', LinearRegression)
```

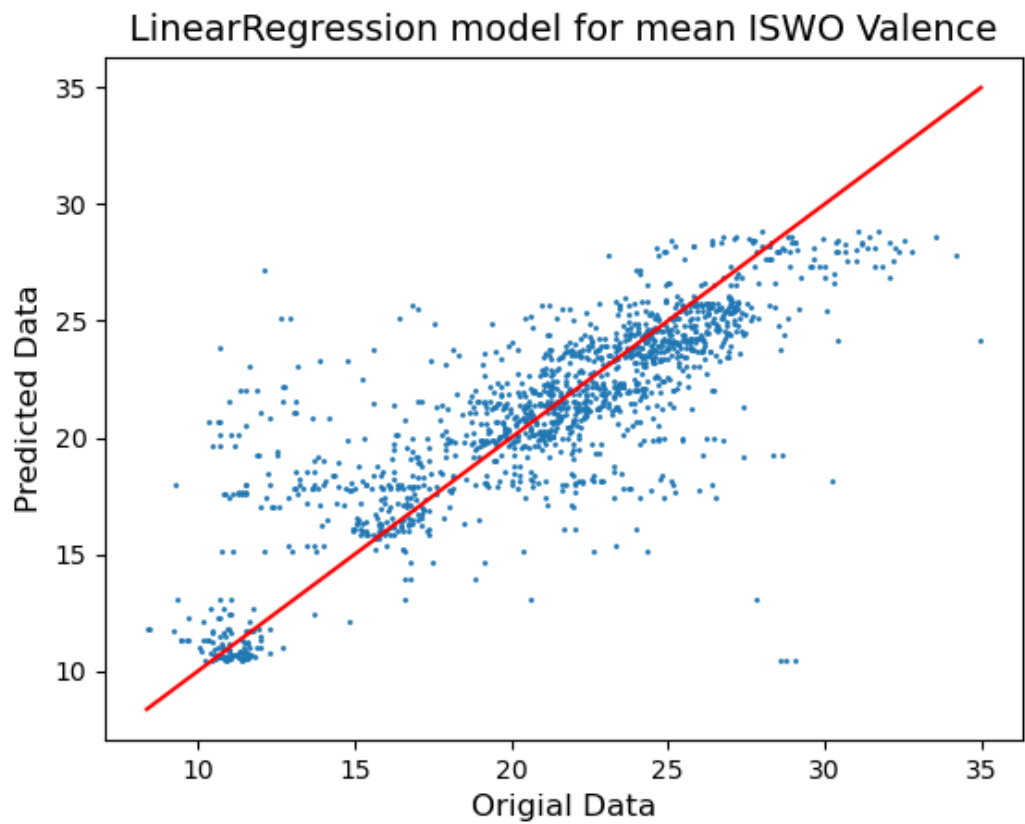

Mean Absolute diviation: 1.990  
Pearsons correlation: 0.815  
R2: 0.664

In [16]:

```
iswo_cond_model = get_model(df, 'mean_iswo_cond', LinearRegression)
```

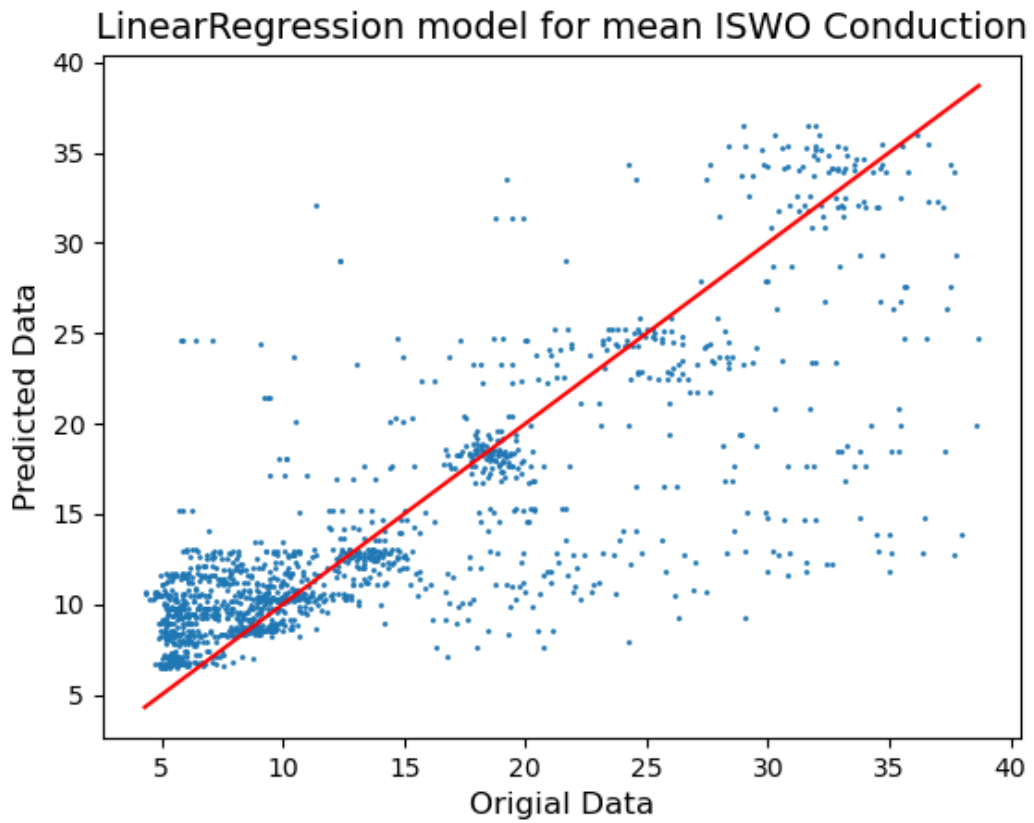

Mean Absolute deviation: 3.420  
Pearsons correlation: 0.802  
R2: 0.643

In [17]:

```
formation_model = get_model(df, 'dissociation_energy_per_O', LinearRegression)
```

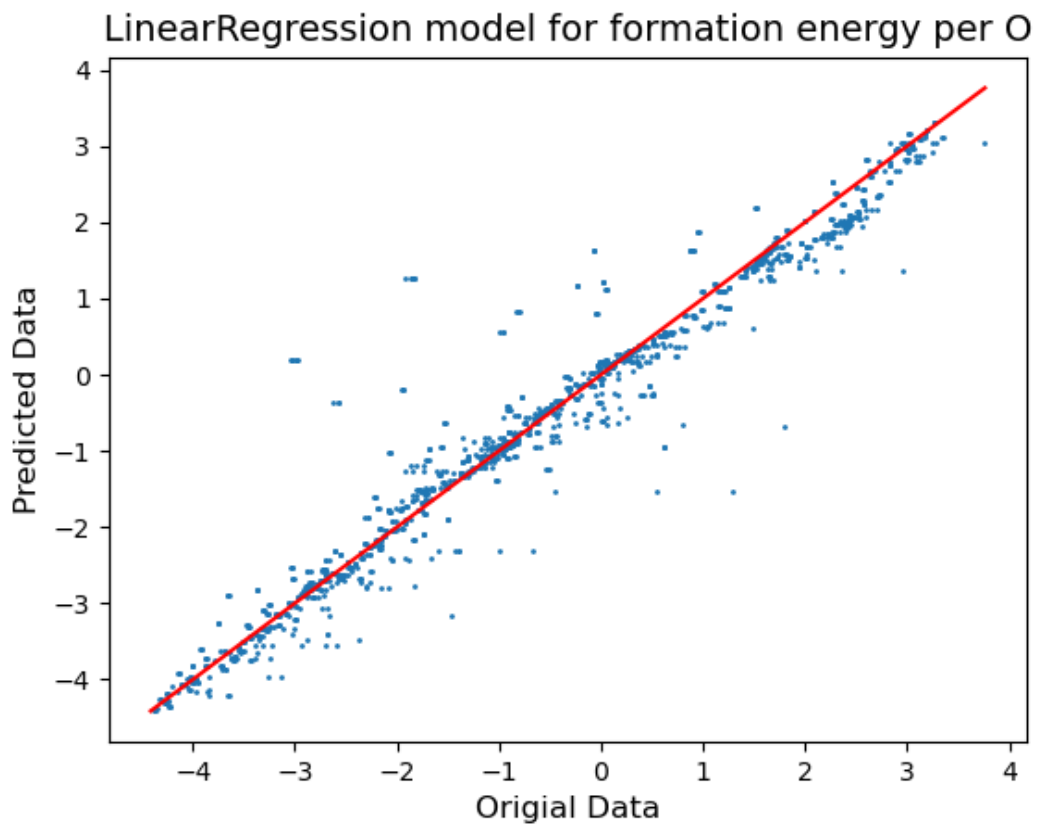

Mean Absolute deviation: 0.248

Pearsons correlation: 0.971  
R2: 0.944

## Gaussian process

```
In [18]: from sklearn.gaussian_process.kernels import DotProduct, WhiteKernel, RBF, RationalQ
kernel = RBF(length_scale=5, length_scale_bounds='fixed')
gap_model = get_model(df, 'transport_gap', GaussianProcessRegressor, kernel=kernel)
```

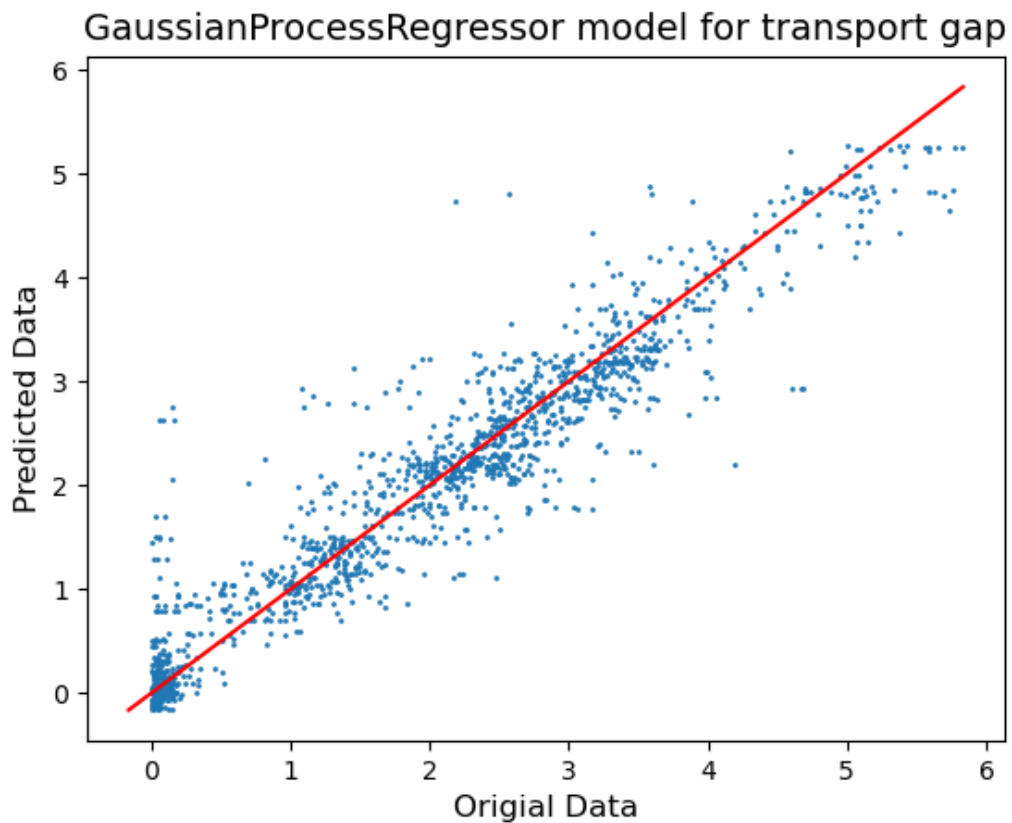

Mean Absolute deviation: 0.292  
Pearsons correlation: 0.949  
R2: 0.900

```
In [19]: kernel = RBF(length_scale=10, length_scale_bounds='fixed')
iswo_val_model = get_model(df, 'mean_iswo_val', GaussianProcessRegressor, kernel = k
```

GaussianProcessRegressor model for mean ISWO Valence

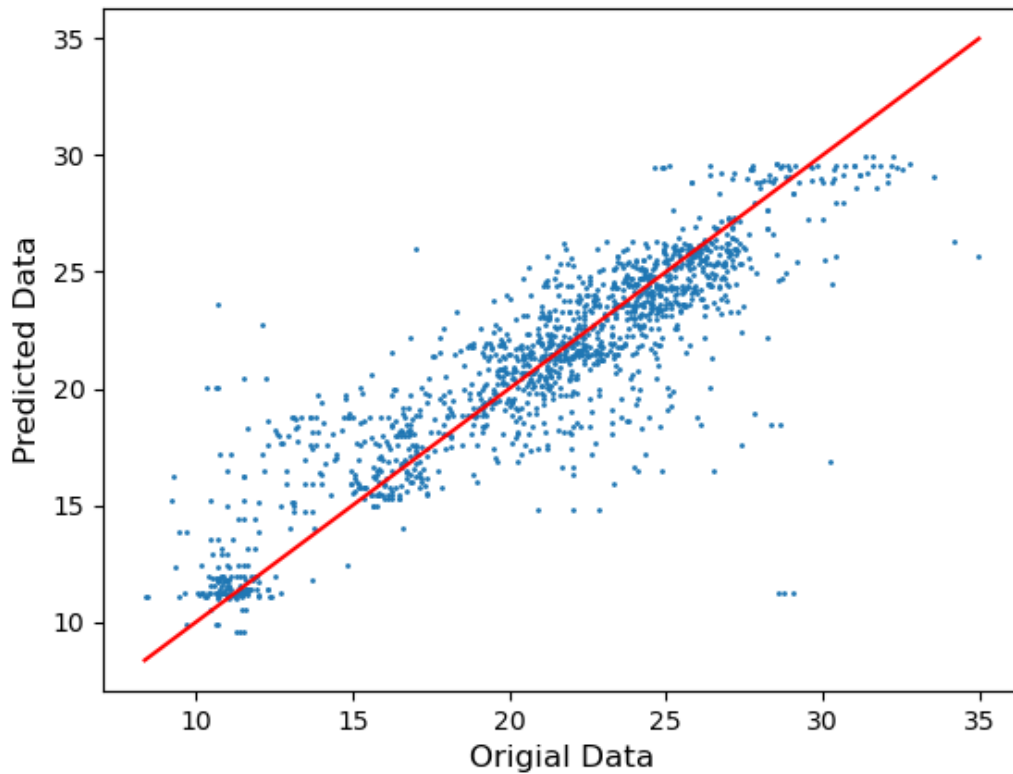

Mean Absolute deviation: 1.651  
Pearsons correlation: 0.878  
R2: 0.771

In [20]:

```
kernel = RBF(length_scale=20, length_scale_bounds='fixed')  
kernel = RationalQuadratic(length_scale=4, alpha=200, length_scale_bounds='fixed', a  
iswo_cond_model = get_model(df, 'mean_iswo_cond', GaussianProcessRegressor, kernel=k
```

GaussianProcessRegressor model for mean ISWO Conduction

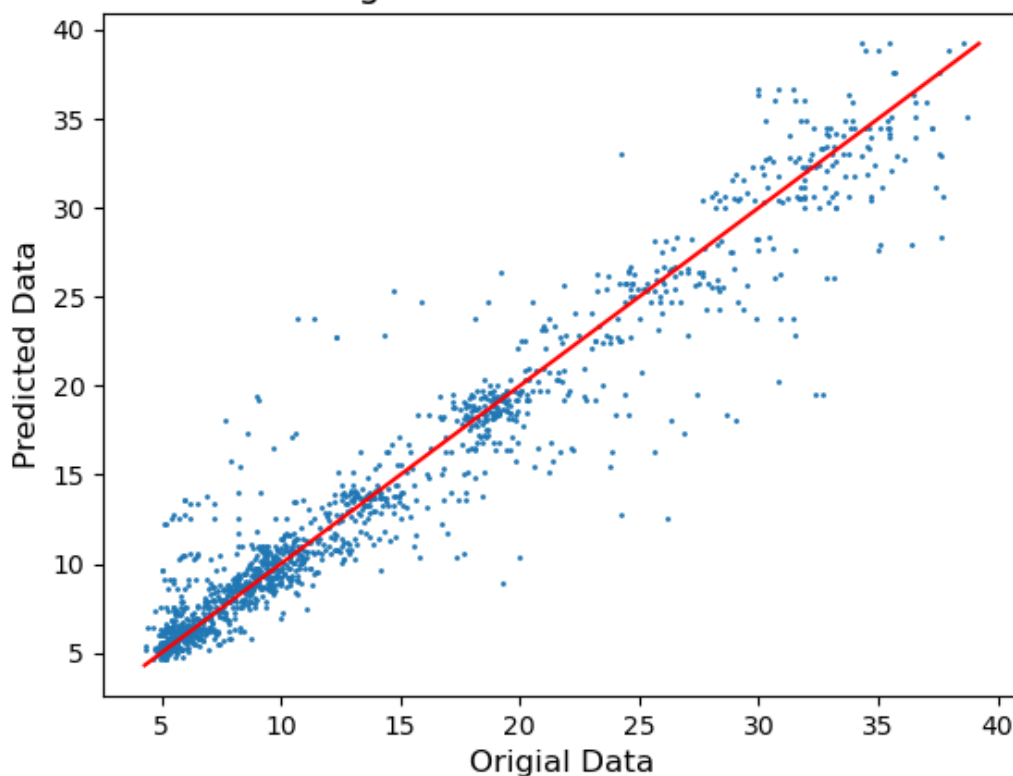

Mean Absolute deviation: 1.423  
Pearsons correlation: 0.963  
R2: 0.927

```
In [21]: kernel = RBF(length_scale=2, length_scale_bounds='fixed')  
formation_model = get_model(df, 'dissociation_energy_per_O', GaussianProcessRegressor)
```

GaussianProcessRegressor model for formation energy per O

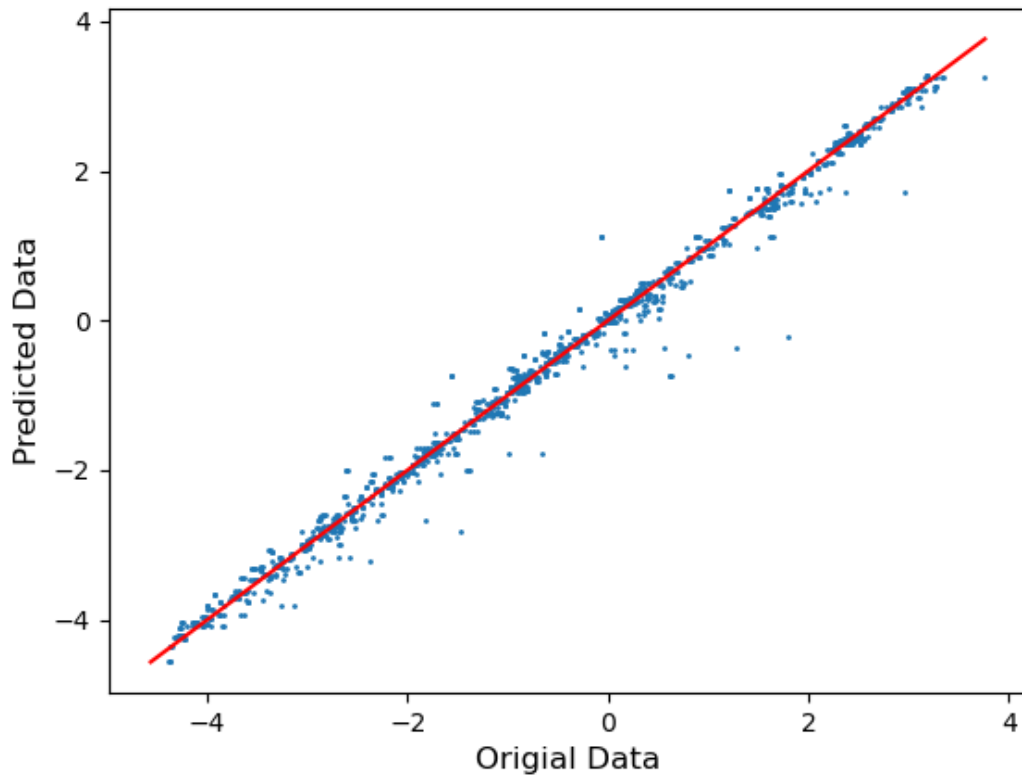

Mean Absolute deviation: 0.110  
Pearsons correlation: 0.995  
R2: 0.990

## svm

```
In [22]: degree = 10  
epsilon = 0.001  
C=400  
kernel='poly'
```

```
In [23]: gap_model = get_model(df, 'transport_gap', SVR, kernel=kernel, C=C, gamma='auto', de  
epsilon=epsilon, coef0=1)
```



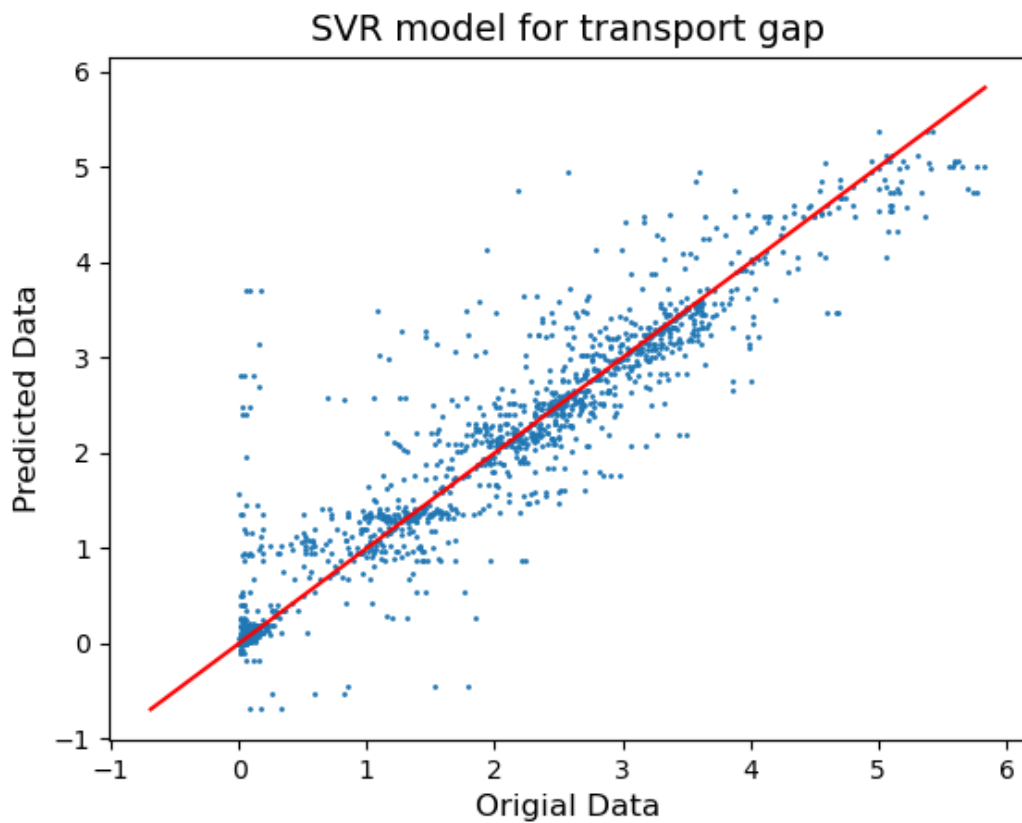

Mean Absolute deviation: 0.301  
Pearsons correlation: 0.928  
R2: 0.857

In [24]:

```
iswo_val_model = get_model(df, 'mean_iswo_val', SVR, kernel='poly', C=100, gamma='auto',  
epsilon=epsilon, coef0=1)
```

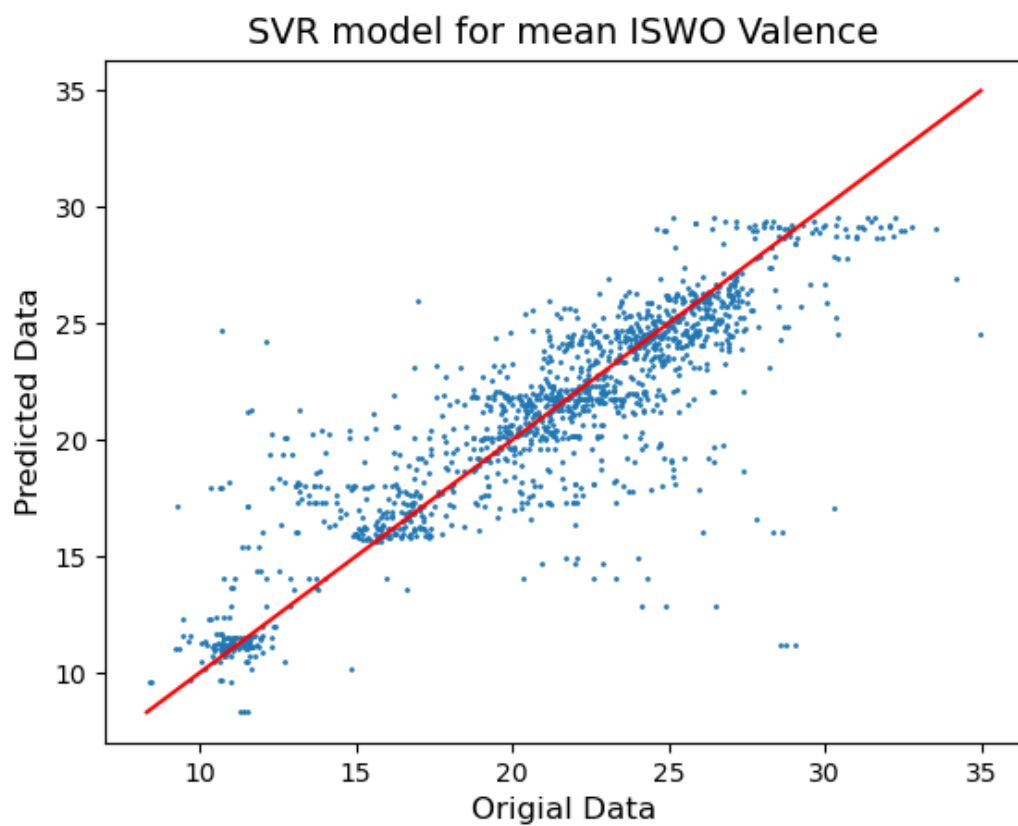

Mean Absolute deviation: 1.654  
Pearsons correlation: 0.861  
R2: 0.740

In [25]:

```
iswo_cond_model = get_model(df, 'mean_iswo_cond', SVR, kernel='poly', C=100, gamma='  
epsilon=epsilon, coef0=1)
```

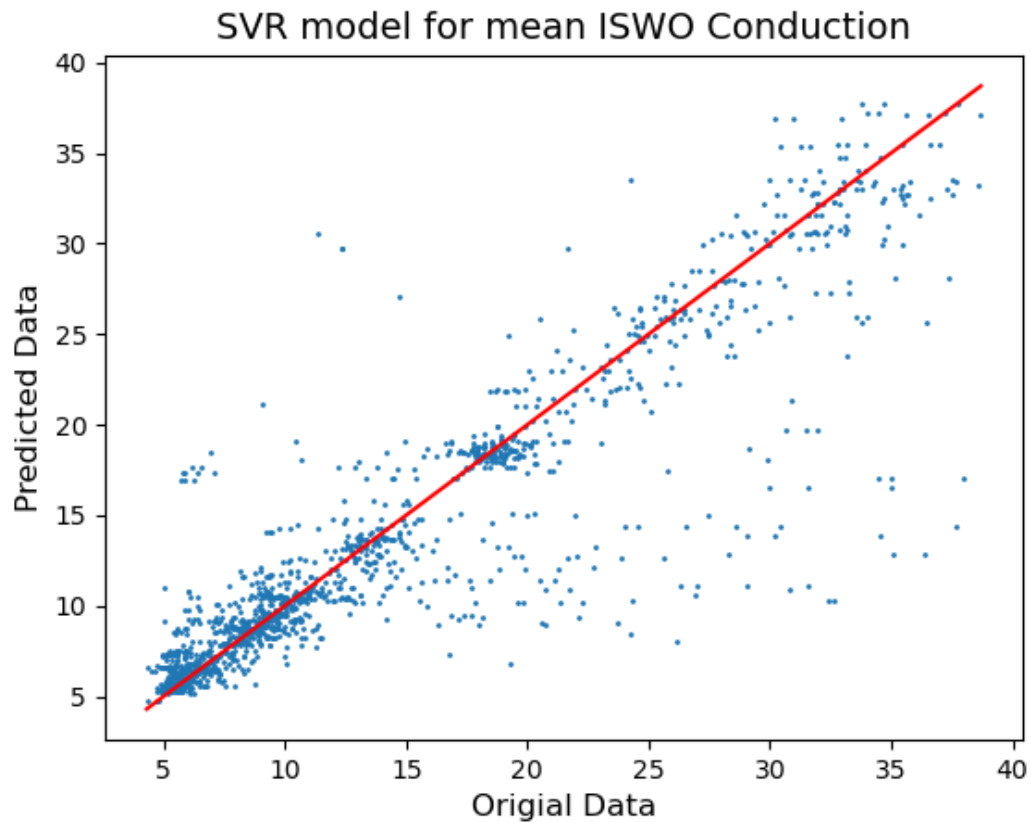

Mean Absolute deviation: 1.903  
Pearsons correlation: 0.906  
R2: 0.818

In [26]:

```
formation_model = get_model(df, 'dissociation_energy_per_0', SVR, kernel='poly', C=1  
epsilon=epsilon, coef0=1)
```

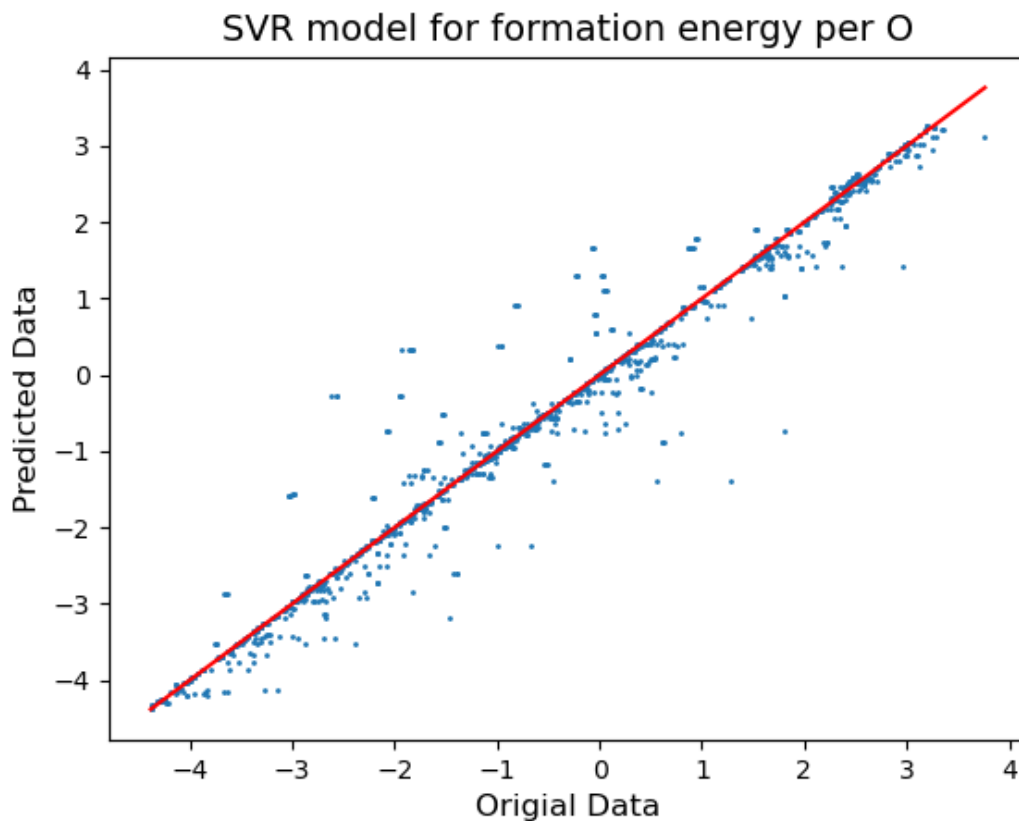

Mean Absolute deviation: 0.155  
 Pearsons correlation: 0.982  
 R2: 0.964

## Correlations between model errors

In predictions for the ISWO and gap values we observe several severe outliers. These points do not show any correlation. There are only some individual systems that have serious outlier errors for two observables at the same time. These cases, however, do not form a specific class of materials.

In [27]:

```
import copy
df_compare = copy.deepcopy(df[['composition', 'descriptor', 'dissociation_energy_per_0'])
df_compare['p_dissociation_energy_per_0'] = formation_model.predict(list(df_compare['descriptor']))
df_compare['e_dissociation_energy_per_0'] = df_compare['p_dissociation_energy_per_0'] - df_compare['dissociation_energy_per_0']
df_compare['p_mean_iswo_cond'] = iswo_cond_model.predict(list(df_compare['descriptor']))
df_compare['e_mean_iswo_cond'] = df_compare['p_mean_iswo_cond'] - df_compare['mean_iswo_cond']
df_compare['p_mean_iswo_val'] = iswo_val_model.predict(list(df_compare['descriptor']))
df_compare['e_mean_iswo_val'] = df_compare['p_mean_iswo_val'] - df_compare['mean_iswo_val']
df_compare['p_transport_gap'] = gap_model.predict(list(df_compare['descriptor']))
df_compare['e_transport_gap'] = df_compare['p_transport_gap'] - df_compare['transport_gap']
df_compare.plot.scatter('e_transport_gap', 'e_mean_iswo_val')
df_compare.plot.scatter('e_transport_gap', 'e_mean_iswo_cond')
df_compare.plot.scatter('e_mean_iswo_val', 'e_mean_iswo_cond')
```

/home/vsette63/anaconda3/envs/2022.4/lib/python3.7/site-packages/pandas/plotting/\_matplotlib/core.py:345: RuntimeWarning: More than 20 figures have been opened. Figures created through the pyplot interface (`matplotlib.pyplot.figure`) are retained until explicitly closed and may consume too much memory. (To control this warning, see the rcParam `figure.max_open_warning`).

```
fig = self.plt.figure(figsize=self.figsize)
```

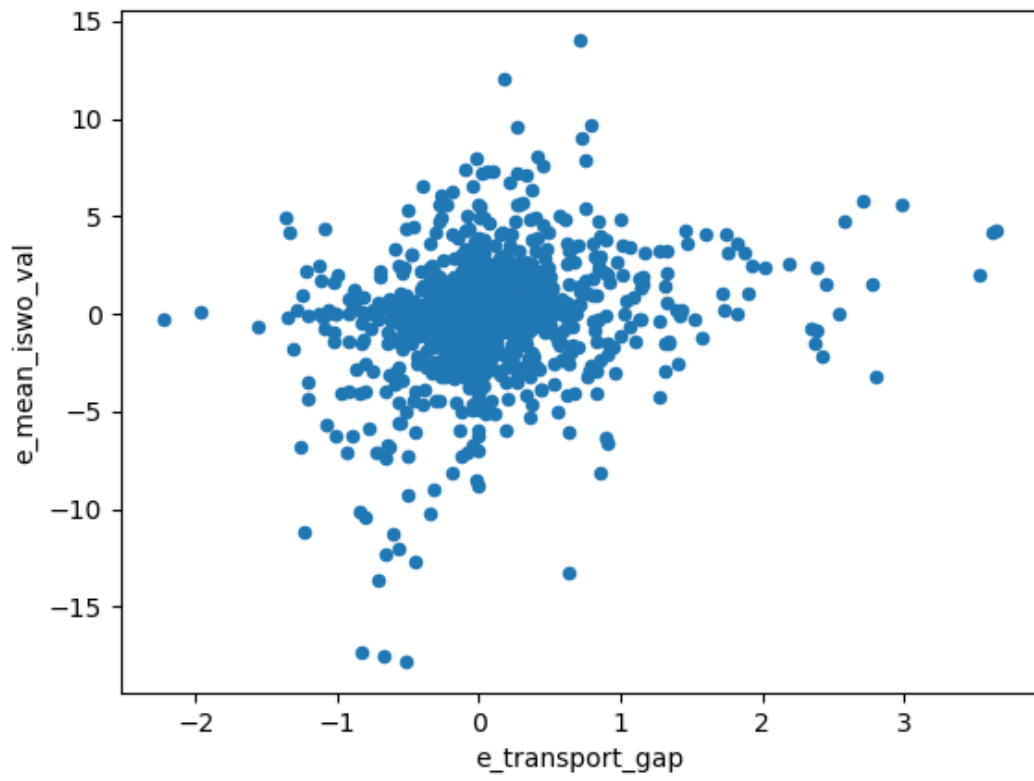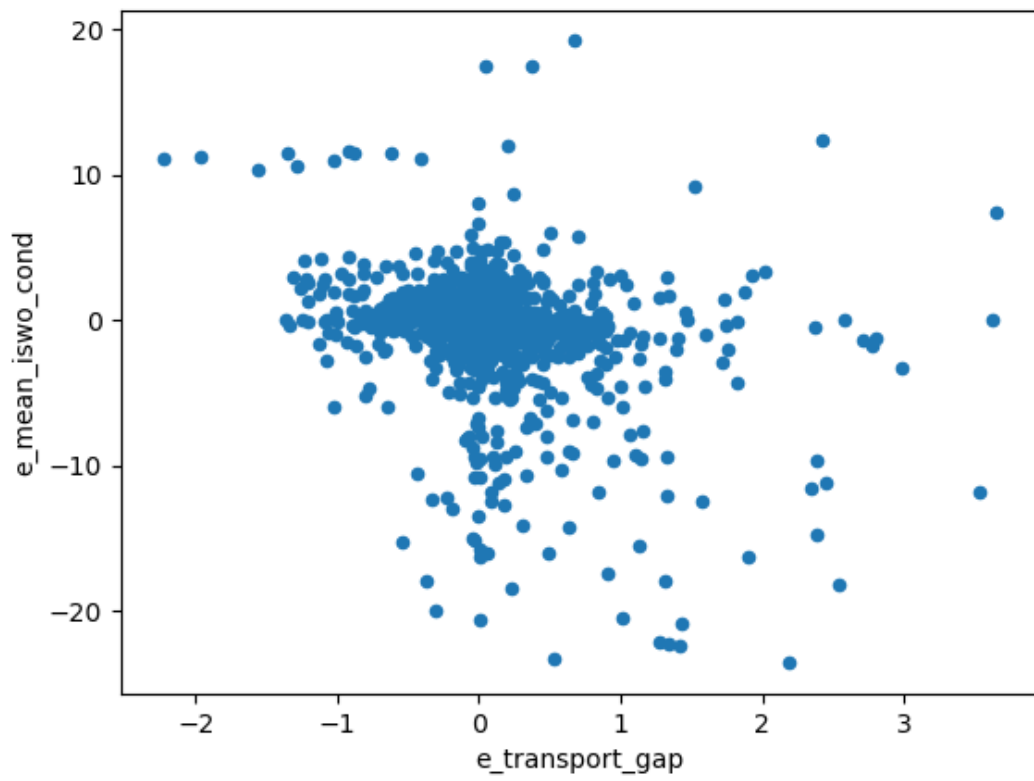

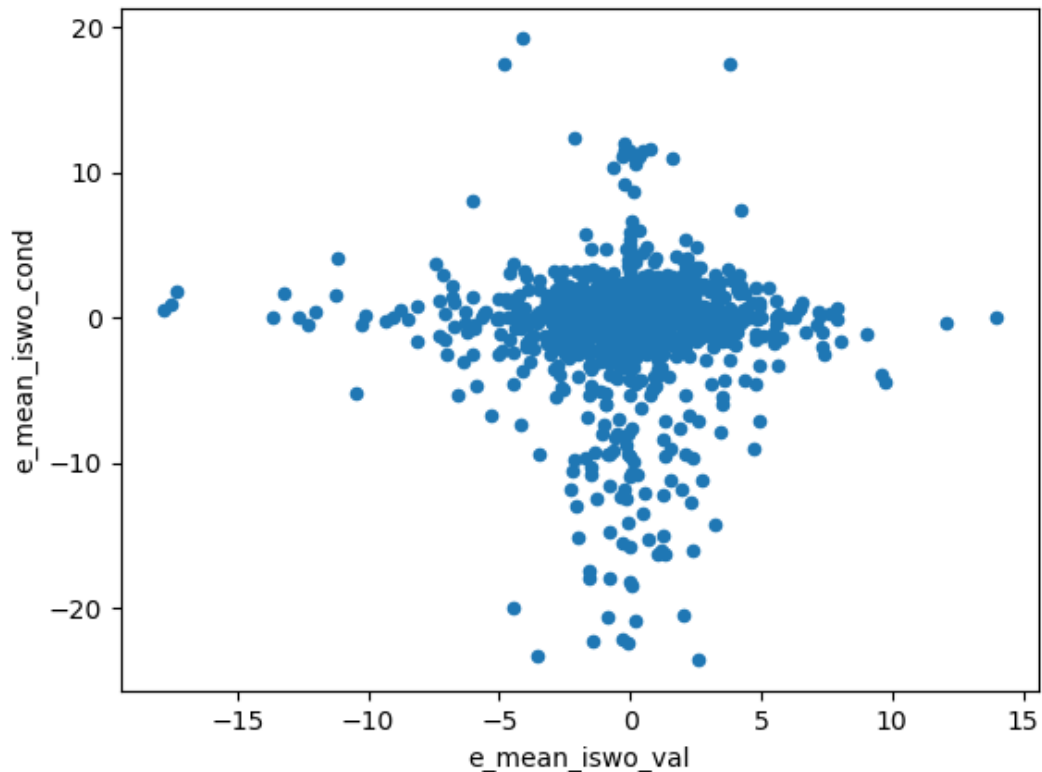

Out[27]: <AxesSubplot:xlabel='e\_mean\_iswo\_val', ylabel='e\_mean\_iswo\_cond'>

## correlations

In [28]:

```

stabilities = []
pd.set_option("precision", 2)

def _color_blue_or_red(val):
    color = 'red' if val < 0 else 'blue'
    return 'color: %s' % color

for r in df.itertuples():
    x = r.descriptor
    e = 0
    for i, y in enumerate(x):
        v = [0]*len(x)
        v[i] = 1
        e += y * formation_model.predict([v])

    stability = formation_model.predict([x]) - e

    stabilities.append(stability[0])

df['stability'] = stabilities

elements = ['Ag', 'Al', 'Cd', 'Ga', 'In', 'Mg', 'Sb', 'Si', 'Sn', 'Ti', 'Zn', 'Zr']
corr = df[['Ag', 'Al', 'Cd', 'Ga', 'In', 'Mg', 'Sb', 'Si', 'Sn', 'Ti', 'Zn', 'Zr',
           'skip_cond', 'skip_val', 'mean_iswo_cond', 'mean_iswo_val',
           'transport_gap', 'dissociation_energy_per_O', 'stability']].corr()
corr_sort = corr[['dissociation_energy_per_O', 'skip_cond', 'skip_val', 'mean_iswo_c
                 'transport_gap', 'stability']].sort_values(by='dissociation_energy_per_O')
corr_sort[corr_sort.index.isin(elements)].style.applymap(_color_blue_or_red)

```

Out[28]:

|    | dissociation_energy_per_O | skip_cond | skip_val | mean_iswo_cond | mean_iswo_val | transport_gap |
|----|---------------------------|-----------|----------|----------------|---------------|---------------|
| Zr | -0.51                     | 0.17      | 0.10     | 0.35           | 0.20          | 0.24          |
| Ti | -0.41                     | 0.14      | 0.08     | 0.64           | 0.16          | 0.07          |
| Al | -0.33                     | 0.17      | 0.02     | -0.08          | 0.14          | 0.42          |
| Si | -0.19                     | 0.15      | 0.10     | -0.02          | -0.06         | 0.33          |
| Mg | -0.10                     | 0.06      | 0.04     | -0.12          | 0.39          | 0.14          |
| Sn | -0.06                     | 0.06      | -0.07    | -0.20          | -0.61         | -0.16         |
| Ga | 0.01                      | 0.03      | 0.14     | -0.14          | 0.03          | 0.19          |
| In | 0.12                      | -0.05     | 0.13     | -0.25          | 0.26          | 0.04          |
| Zn | 0.12                      | -0.06     | 0.00     | -0.18          | -0.06         | 0.03          |
| Sb | 0.34                      | -0.08     | 0.05     | -0.13          | -0.19         | -0.25         |
| Ag | 0.40                      | -0.24     | -0.26    | 0.16           | 0.07          | -0.48         |
| Cd | 0.50                      | -0.32     | -0.33    | -0.03          | -0.27         | -0.41         |

In [29]:

```

from itertools import combinations
import copy

corrs = []

for c in combinations(elements, 2):
    not_c = [e for e in elements if e not in c]
    #print(c, not_c)
    df_work = copy.deepcopy(df)
    for e in not_c:
        #print(e)
        df_work = df_work[df_work[e] == 0]
    prop_list = ['dissociation_energy_per_O', 'mean_iswo_cond', 'mean_iswo_val', 'tran
    corr_list = list(c) + prop_list
    corr = df_work[corr_list].corr()
    corr = corr[corr.index.isin(c)]
    corrs.append(corr[prop_list])

corrs_df = pd.concat(corrs).reset_index()
corrs_df = corrs_df.groupby(by='index').agg('mean')
corrs_df.sort_values(by='dissociation_energy_per_O').style.applymap(_color_blue_or_r
print(corrs_df.sort_values(by='dissociation_energy_per_O').to_latex())
corrs_df.sort_values(by='dissociation_energy_per_O').style.applymap(_color_blue_or_r

```

```

\begin{tabular}{lrrrrrrr}
\toprule
{} & dissociation\_energy\_per\_O & mean\_iswo\_cond & mean\_iswo\_val & transpo
rt\_gap & stability & skip\_cond & skip\_val \\
index & & & & & & & \\
& & & & & & & \\
& & & & & & & \\
\midrule
Zr & & -0.98 & & 0.74 & & 0.44 & 0.
37 & -0.06 & & 0.21 & & 0.12 \\
Ti & & -0.75 & & 0.65 & & 0.19 & 0.
07 & 0.07 & & 0.06 & & 0.19 \\
Al & & -0.59 & & -0.18 & & 0.23 & 0.
65 & 0.18 & & 0.21 & & -0.06 \\
Si & & -0.40 & & -0.03 & & -0.14 & 0.

```

```

81 &      0.28 &      0.55 &      0.37 \\
Mg &      &      &      -0.21 &      &      -0.41 &      &      0.80 &      &      0.
27 &      0.09 &      0.08 &      -0.02 \\
Sn &      &      &      -0.03 &      &      -0.14 &      &      -0.32 &      &      -0.
36 &      -0.09 &      0.10 &      0.04 \\
Ga &      &      &      0.04 &      &      -0.29 &      &      -0.06 &      &      0.
30 &      -0.11 &      -0.05 &      0.24 \\
In &      &      &      0.34 &      &      -0.58 &      &      0.48 &      &      -0.
16 &      0.05 &      -0.08 &      0.15 \\
Zn &      &      &      0.43 &      &      -0.51 &      &      -0.34 &      &      -0.
11 &      0.15 &      -0.09 &      -0.15 \\
Sb &      &      &      0.47 &      &      0.11 &      &      -0.49 &      &      -0.
37 &      -0.35 &      -0.18 &      0.11 \\
Ag &      &      &      0.73 &      &      0.37 &      &      -0.13 &      &      -0.
61 &      -0.36 &      -0.19 &      -0.39 \\
Cd &      &      &      0.96 &      &      0.28 &      &      -0.69 &      &      -0.
85 &      0.16 &      -0.62 &      -0.61 \\
\bottomrule
\end{tabular}

```

Out[29]:

|  | dissociation_energy_per_O | mean_iswo_cond | mean_iswo_val | transport_gap | stability | skip_con |
|--|---------------------------|----------------|---------------|---------------|-----------|----------|
|--|---------------------------|----------------|---------------|---------------|-----------|----------|

| index | dissociation_energy_per_O | mean_iswo_cond | mean_iswo_val | transport_gap | stability | skip_con |
|-------|---------------------------|----------------|---------------|---------------|-----------|----------|
| Zr    | -0.98                     | 0.74           | 0.44          | 0.37          | -0.06     | 0.2      |
| Ti    | -0.75                     | 0.65           | 0.19          | 0.07          | 0.07      | 0.0      |
| Al    | -0.59                     | -0.18          | 0.23          | 0.65          | 0.18      | 0.2      |
| Si    | -0.40                     | -0.03          | -0.14         | 0.81          | 0.28      | 0.5      |
| Mg    | -0.21                     | -0.41          | 0.80          | 0.27          | 0.09      | 0.0      |
| Sn    | -0.03                     | -0.14          | -0.32         | -0.36         | -0.09     | 0.1      |
| Ga    | 0.04                      | -0.29          | -0.06         | 0.30          | -0.11     | -0.0     |
| In    | 0.34                      | -0.58          | 0.48          | -0.16         | 0.05      | -0.0     |
| Zn    | 0.43                      | -0.51          | -0.34         | -0.11         | 0.15      | -0.0     |
| Sb    | 0.47                      | 0.11           | -0.49         | -0.37         | -0.35     | -0.1     |
| Ag    | 0.73                      | 0.37           | -0.13         | -0.61         | -0.36     | -0.1     |
| Cd    | 0.96                      | 0.28           | -0.69         | -0.85         | 0.16      | -0.6     |

## finding optimal compositions

```

In [30]:
def metric(element_vector):
    gap_delta_aim = 1
    iswo_cond_factor = 1
    iswo_val_factor = 0.2
    formation_model_factor = 1
    metric = (gap_model.predict([element_vector])[0] - 2.0 - gap_delta_aim)**2
    metric += iswo_cond_factor * iswo_cond_model.predict([element_vector])[0]
    metric += - iswo_val_factor * iswo_val_model.predict([element_vector])[0]
    return metric

```

```

In [31]:
igzo_gap = gap_model.predict([composition_string_to_vector('In50Ga50Zn500200')])[0]
igzo_iswo_c = iswo_cond_model.predict([composition_string_to_vector('In50Ga50Zn50020

```

```

igzo_iswo_v = iswo_val_model.predict([composition_string_to_vector('In50Ga50Zn50O200
igzo_formation = formation_model.predict([composition_string_to_vector('In50Ga50Zn50
print(igzo_gap)
print(igzo_iswo_c)
print(igzo_iswo_v)
print(igzo_formation)

```

```

2.5579790682542263
5.8702958759611015
22.6086060861648
-0.025452122791994825

```

## pairwise data comparison

Comparison of the predictions to the actual data in the one dimensional subspaces of binary oxides.

In [32]:

```

elems = ['Ag', 'Al', 'Cd', 'Ga', 'In', 'Mg', 'Sb', 'Sn', 'Si', 'Ti', 'Zn', 'Zr']
from itertools import combinations
n = 20
count = 0
for c in combinations(['In', 'Zn', 'Ga'], 2):
    fig, ax = plt.subplots(1)
    y = [gap_model.predict([composition_string_to_vector(f'{c[0]}{n}{c[1]}{100-n}')])
    ax.plot(y, label='gap', color = 'k')
    y = [iswo_cond_model.predict([composition_string_to_vector(f'{c[0]}{n}{c[1]}{100-n}')])
    ax.plot(y, label='ISWO cond', color = 'b')
    y = [iswo_val_model.predict([composition_string_to_vector(f'{c[0]}{n}{c[1]}{100-n}')])
    ax.plot(y, label='ISWO val', color = 'r')
    y = [formation_model.predict([composition_string_to_vector(f'{c[0]}{n}{c[1]}{100-n}')])
    ax.plot(y, label='formation energy', color = 'g')
    ax.set_title(f'0: {c[1]}-0                                100: {c[0]}')
    test = np.ones(len(elems))
    x_data = []
    iswo_c_data = []
    iswo_v_data = []
    gap_data = []
    formation_data = []
    indices = [elems.index(e) for e in c]
    for i in indices:
        test[i] = 0
    for i in df.itertuples():
        if np.dot(np.array(i.descriptor), test) == 0:
            x = 100 * i.descriptor[indices[0]] / (i.descriptor[indices[0]] + i.descriptor[indices[1]])
            x_data.append(x)
            gap_data.append(i.transport_gap)
            iswo_c_data.append(i.mean_iswo_cond)
            iswo_v_data.append(i.mean_iswo_val)
            formation_data.append(i.dissociation_energy_per_O)
    ax.scatter(x_data, iswo_c_data, color='b')
    ax.scatter(x_data, iswo_v_data, color='r')
    ax.scatter(x_data, gap_data, color='k')
    ax.scatter(x_data, formation_data, color='g')
    ax.legend()
    count += 1
    if count > n:
        break

```



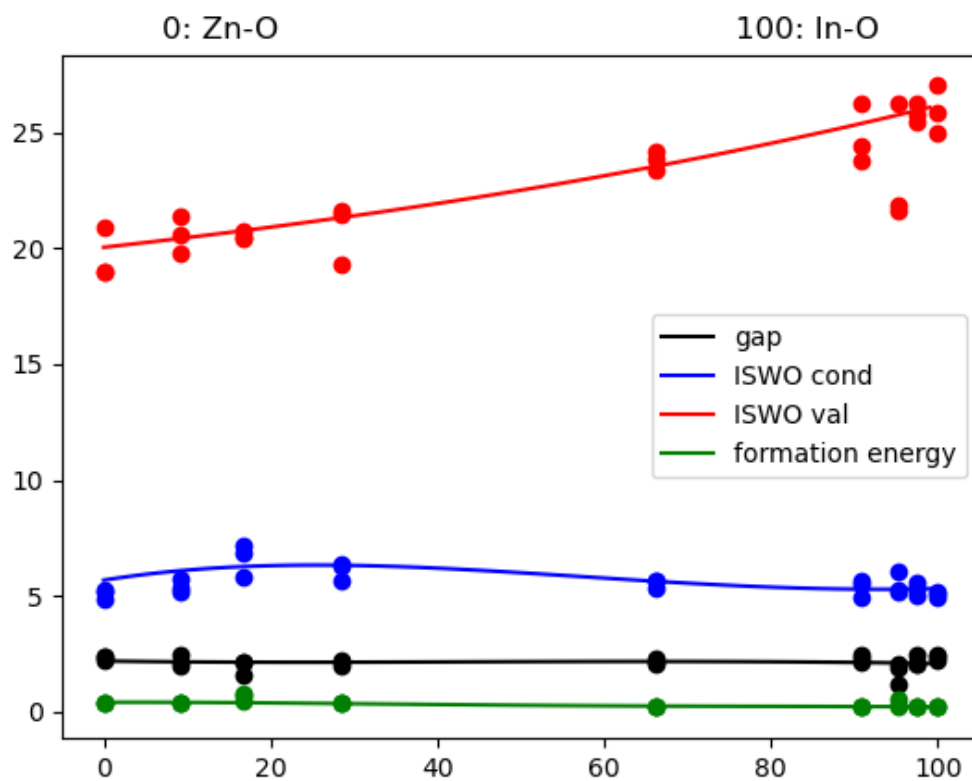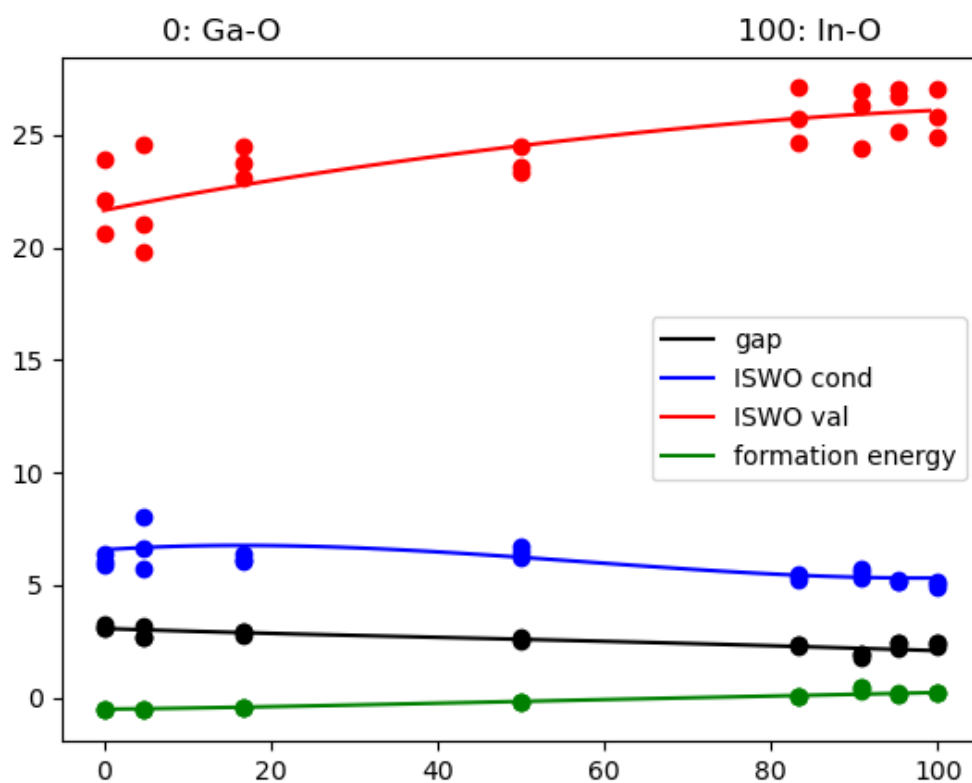



```

form = ''
for i, val in enumerate(vec):
    if val > 0.01:
        form += f'{elems[i]}{val:0.2f}'
return form

def full_from_active(vec):
    element_vector = [0]*len(elems)
    for i, v in enumerate(vec):
        element_vector[elems.index(active[i])] = v
    return element_vector

solutions = []

for gap_delta_aim, iswo_cond_factor, iswo_val_factor, formation_factor in product(ga
print(gap_delta_aim, iswo_cond_factor, iswo_val_factor, formation_factor)

def metric(element_vector_in):
    element_vector = full_from_active(element_vector_in)
    metric = (gap_model.predict([element_vector])[0] - 2.0 - gap_delta_aim)**2
    metric += iswo_cond_factor * iswo_cond_model.predict([element_vector])[0]
    metric -= iswo_val_factor * iswo_val_model.predict([element_vector])[0]
    metric += formation_factor * formation_model.predict([element_vector])[0]
    return metric

def constraint_fun(x):
    return(sum(x))

import random

best = None

constraint = NonlinearConstraint(constraint_fun, 1, 1)

for c in range(0,50):
    x0 = [random.random() for i in range(0,len(active))]
    x0 = [x / sum(x0) for x in x0]
    bounds = len(active)*[(0,1)]
    res = minimize(metric, x0=x0, bounds=bounds, constraints=constraint, method=
    if not res.success:
        continue
    if best is None:
        best = res
    elif res.fun < best.fun:
        best = res
        print(get_formula(full_from_active(res.x)), res.fun)

best = dict(best)
x = full_from_active(best['x'])
best['jac'] = list(best['jac'])
best['x'] = list(x)
best['success'] = bool(best['success'])

solution = {'formula': get_formula(x),
            'gap': round(float(gap_model.predict([x])), 2),
            'iswo_c': round(float(iswo_cond_model.predict([x])), 2),
            'iswo_v': round(float(iswo_val_model.predict([x])), 2),
            'formation': round(float(formation_model.predict([x])), 2),
            'res' : best,
            'target' : {'gap_delta_aim': gap_delta_aim, 'iswo_cond_factor': iswo
                        'iswo_val_factor': iswo_val_factor, 'formation_factor':
            'models' : {'gap_model': str(gap_model), 'iswo_cond_model': str(iswo
                        'iswo_val_model': str(iswo_val_model), 'formation_model'
            'models_path': models_path}

```

```

e = 0
for i, y in enumerate(x):
    v = [0]*len(x)
    v[i] = 1
    e += y * formation_model.predict([v])

stability = formation_model.predict([x]) - e

solution['stability'] = stability[0]

solutions.append(solution)

print(f"gap           : {gap_model.predict([x])[0]:1.2f}")
print(f"iswo conduction : {iswo_cond_model.predict([x])[0]:1.2f}")
print(f"iswo valence   : {iswo_val_model.predict([x])[0]:1.2f}")
print(f"formation      : {formation_model.predict([x])[0]:1.2f}")
print(f"stability       : {stability[0]:1.2f}")

get_formula(x)

with open(os.path.join(models_path, 'solutions.json'), 'w') as f:
    json.dump(solutions, f, indent=2)

```

```

0 0.1 0.01 0.0
In1.00 0.2784521816610798
In1.00 0.27845218165706664
In1.00 0.2784521816516457
In1.00 0.27845218154610224
In1.00 0.27845218151787665
In1.00 0.2784521808420297
gap           : 2.09
iswo conduction : 5.31
iswo valence   : 26.08
formation      : 0.21
stability      : 0.00
0 0.1 0.01 0.5
Al0.71Sn0.29 -0.3687735482185699
Sn0.53Zr0.47 -0.4972320965481041
Sn0.53Zr0.47 -0.49723217022844113
gap           : 2.04
iswo conduction : 10.46
iswo valence   : 8.01
formation      : -2.93
stability      : -0.41
0 0.1 0.01 1.0
Sn0.43Zr0.57 -2.039420566221399
Sn0.43Zr0.57 -2.0394213800621896
gap           : 2.26
iswo conduction : 12.21
iswo valence   : 9.25
formation      : -3.23
stability      : -0.37
0 0.1 0.01 1.5
Sn0.33Zr0.67 -3.7279221282635753
Sn0.33Zr0.67 -3.7279222340308253
Sn0.33Zr0.67 -3.7279222897136126
Sn0.33Zr0.67 -3.7279222984798164
gap           : 2.46
iswo conduction : 14.40
iswo valence   : 11.26
formation      : -3.51
stability      : -0.30
0 0.1 0.02 0.0

```

In1.00 0.017634655617461248  
In1.00 0.017634655566571844  
gap : 2.09  
iswo conduction : 5.31  
iswo valence : 26.08  
formation : 0.21  
stability : 0.00  
0 0.1 0.02 0.5  
Al0.71Sn0.29 -0.5216052745434137  
Sn0.53Zr0.47 -0.5775710610194147  
Sn0.53Zr0.47 -0.5775710782792106  
Sn0.53Zr0.47 -0.5775710859803733  
gap : 2.05  
iswo conduction : 10.55  
iswo valence : 8.06  
formation : -2.95  
stability : -0.40  
0 0.1 0.02 1.0  
Sn0.42Zr0.58 -2.132949639187236  
Sn0.42Zr0.58 -2.132949639189418  
Sn0.42Zr0.58 -2.1329497959325416  
gap : 2.28  
iswo conduction : 12.45  
iswo valence : 9.46  
formation : -3.27  
stability : -0.36  
0 0.1 0.02 1.5  
Ag0.05Sn0.13Zr0.82 -3.8734842091862536  
Ag0.05Sn0.13Zr0.82 -3.873484222882431  
gap : 2.37  
iswo conduction : 20.14  
iswo valence : 18.52  
formation : -3.77  
stability : -0.18  
0 0.2 0.01 0.0  
In1.00 0.8094632507141805  
In1.00 0.8094632341011374  
In1.00 0.8094632199947489  
gap : 2.09  
iswo conduction : 5.31  
iswo valence : 26.08  
formation : 0.21  
stability : 0.00  
0 0.2 0.01 0.5  
Al0.46Mg0.16Sn0.38 0.5297321157012564  
Al0.46Mg0.16Sn0.38 0.5297319518049157  
Al0.46Mg0.16Sn0.38 0.5297319296177474  
Al0.46Mg0.16Sn0.38 0.5297316546156188  
Sn0.60Zr0.40 0.4956308597081598  
Sn0.60Zr0.40 0.495630759275838  
Sn0.60Zr0.40 0.4956307519747707  
Sn0.60Zr0.40 0.4956307317557429  
gap : 1.88  
iswo conduction : 9.53  
iswo valence : 7.58  
formation : -2.70  
stability : -0.42  
0 0.2 0.01 1.0  
Al0.73Sn0.27 -0.6137240036206699  
Al0.73Sn0.27 -0.6137271567760956  
Sn0.53Zr0.47 -0.9161585670839645  
Sn0.53Zr0.47 -0.9161588817135984  
Sn0.53Zr0.47 -0.9161590874093015  
gap : 2.05

iswo conduction : 10.52  
iswo valence : 8.05  
formation : -2.94  
stability : -0.41  
0 0.2 0.01 1.5  
Sn0.46Zr0.54 -2.442792273097615  
Sn0.46Zr0.54 -2.4427923278928803  
gap : 2.21  
iswo conduction : 11.72  
iswo valence : 8.87  
formation : -3.16  
stability : -0.38  
0 0.2 0.02 0.0  
gap : 2.09  
iswo conduction : 5.31  
iswo valence : 26.08  
formation : 0.21  
stability : 0.00  
0 0.2 0.02 0.5  
Al0.48Mg0.15Sn0.37 0.3864259513320296  
Al0.48Mg0.15Sn0.37 0.3864257862911311  
Al0.48Mg0.15Sn0.37 0.38642574645608097  
Al0.48Mg0.15Sn0.37 0.3864254276857422  
gap : 2.21  
iswo conduction : 8.27  
iswo valence : 14.43  
formation : -2.05  
stability : -0.11  
0 0.2 0.02 1.0  
Sn0.52Zr0.48 -0.9968099375122856  
Sn0.52Zr0.48 -0.9968099429877377  
Sn0.52Zr0.48 -0.9968104750753095  
Sn0.52Zr0.48 -0.9968113417558391  
gap : 2.06  
iswo conduction : 10.59  
iswo valence : 8.08  
formation : -2.96  
stability : -0.40  
0 0.2 0.02 1.5  
Sn0.45Zr0.55 -2.5319768363684614  
Sn0.45Zr0.55 -2.5319768719761506  
Sn0.45Zr0.55 -2.5319769090455964  
Sn0.45Zr0.55 -2.5319769358481583  
Sn0.45Zr0.55 -2.5319795347315663  
gap : 2.22  
iswo conduction : 11.85  
iswo valence : 8.97  
formation : -3.18  
stability : -0.37  
0.25 0.1 0.01 0.0  
Ga0.09In0.91 0.2790827740236828  
Ga0.09In0.91 0.2790827688678003  
Ga0.09In0.91 0.2790827625528427  
gap : 2.19  
iswo conduction : 5.35  
iswo valence : 25.90  
formation : 0.14  
stability : -0.01  
0.25 0.1 0.01 0.5  
Al0.75Sn0.25 -0.43212883301513716  
Al0.75Sn0.25 -0.43212883531110347  
Al0.75Sn0.25 -0.43212883650022427  
Sn0.46Zr0.54 -0.4948058211794286  
Sn0.46Zr0.54 -0.4948060604687252

gap : 2.20  
iswo conduction : 11.67  
iswo valence : 8.83  
formation : -3.15  
stability : -0.38  
0.25 0.1 0.01 1.0  
Sn0.36Zr0.64 -2.1446379458023532  
Sn0.36Zr0.64 -2.1446379458555533  
Sn0.36Zr0.64 -2.144638319111033  
gap : 2.41  
iswo conduction : 13.79  
iswo valence : 10.66  
formation : -3.44  
stability : -0.32  
0.25 0.1 0.01 1.5  
Sn0.27Zr0.73 -3.9313693055717125  
Sn0.27Zr0.73 -3.9313693130363525  
Sn0.27Zr0.73 -3.9313693173788353  
Sn0.27Zr0.73 -3.9313693189970635  
gap : 2.60  
iswo conduction : 16.19  
iswo valence : 13.12  
formation : -3.69  
stability : -0.25  
0.25 0.1 0.02 0.0  
Ga0.08In0.92 0.019964605014389014  
Ga0.08In0.92 0.019964587441563486  
Ga0.08In0.92 0.019964586362792747  
Ga0.08In0.92 0.019964585636698895  
Ga0.08In0.92 0.019964564568322407  
gap : 2.19  
iswo conduction : 5.35  
iswo valence : 25.94  
formation : 0.14  
stability : -0.00  
0.25 0.1 0.02 0.5  
Al0.76Sn0.24 -0.595044141651533  
Al0.76Sn0.24 -0.5950441448049077  
Al0.76Sn0.24 -0.5950441449617965  
gap : 2.39  
iswo conduction : 9.42  
iswo valence : 16.33  
formation : -2.46  
stability : -0.06  
0.25 0.1 0.02 1.0  
Sn0.34Zr0.66 -2.2532225086274584  
Sn0.34Zr0.66 -2.253222510290489  
Sn0.34Zr0.66 -2.2532225103281145  
Sn0.34Zr0.66 -2.253222514046051  
Sn0.34Zr0.66 -2.2532225141478053  
gap : 2.45  
iswo conduction : 14.20  
iswo valence : 11.06  
formation : -3.49  
stability : -0.31  
0.25 0.1 0.02 1.5  
Sn0.25Zr0.75 -4.065664117384116  
gap : 2.64  
iswo conduction : 16.76  
iswo valence : 13.75  
formation : -3.75  
stability : -0.24  
0.25 0.2 0.01 0.0  
Ga0.06In0.91Zn0.03 0.8120989303401116

gap : 2.17  
iswo conduction : 5.32  
iswo valence : 25.71  
formation : 0.17  
stability : -0.01  
0.25 0.2 0.01 0.5  
Al0.48Mg0.19Sn0.33 0.43401841826176746  
gap : 2.45  
iswo conduction : 7.90  
iswo valence : 15.44  
formation : -2.06  
stability : -0.11  
0.25 0.2 0.01 1.0  
Al0.77Sn0.23 -0.7263937523264665  
Sn0.48Zr0.52 -0.906886818519645  
Sn0.48Zr0.52 -0.9068868434218302  
Sn0.48Zr0.52 -0.9068868455668158  
Sn0.48Zr0.52 -0.906886883670484  
gap : 2.16  
iswo conduction : 11.36  
iswo valence : 8.60  
formation : -3.10  
stability : -0.39  
0.25 0.2 0.01 1.5  
Al0.78Sn0.22 -1.9728578190561779  
Al0.78Sn0.22 -1.9728580276948804  
Sn0.41Zr0.59 -2.5099684812610725  
Sn0.41Zr0.59 -2.5099685183439773  
Sn0.41Zr0.59 -2.509968519151654  
Sn0.41Zr0.59 -2.509968519739983  
Sn0.41Zr0.59 -2.509968692591556  
gap : 2.31  
iswo conduction : 12.73  
iswo valence : 9.70  
formation : -3.31  
stability : -0.35  
0.25 0.2 0.02 0.0  
Ga0.07In0.93 0.5535789550954417  
Ga0.07In0.93 0.5535787547197056  
gap : 2.17  
iswo conduction : 5.33  
iswo valence : 25.95  
formation : 0.16  
stability : -0.00  
0.25 0.2 0.02 0.5  
Al0.49Mg0.19Sn0.32 0.27884709718466505  
Al0.49Mg0.19Sn0.32 0.2788470558448397  
Al0.49Mg0.19Sn0.32 0.2788470539016854  
Al0.49Mg0.19Sn0.32 0.2788467381681059  
gap : 2.47  
iswo conduction : 7.93  
iswo valence : 15.60  
formation : -2.09  
stability : -0.11  
0.25 0.2 0.02 1.0  
Sn0.47Zr0.53 -0.9933037808804754  
Sn0.47Zr0.53 -0.993303807135058  
Sn0.47Zr0.53 -0.9933038173616997  
Sn0.47Zr0.53 -0.9933040643934081  
gap : 2.18  
iswo conduction : 11.48  
iswo valence : 8.68  
formation : -3.12  
stability : -0.38



0.25 0.2 0.02 1.5  
Sn0.40Zr0.60 -2.6077958713418767  
Sn0.40Zr0.60 -2.6077958735514613  
Sn0.40Zr0.60 -2.6077959361647625  
Sn0.40Zr0.60 -2.6077988353641723  
gap : 2.33  
iswo conduction : 12.93  
iswo valence : 9.87  
formation : -3.34  
stability : -0.35  
0.5 0.1 0.01 0.0  
Ga0.10In0.66Mg0.15Zn0.09 0.294268367165692  
Ga0.10In0.66Mg0.15Zn0.09 0.2942683597253882  
Mg0.41Zn0.59 0.29101389540195266  
Mg0.41Zn0.59 0.29101328938717674  
gap : 2.56  
iswo conduction : 5.05  
iswo valence : 21.76  
formation : -0.40  
stability : -0.03  
0.5 0.1 0.01 0.5  
Al0.79Sn0.21 -0.4912948144069258  
Al0.79Sn0.21 -0.49129491670156045  
gap : 2.62  
iswo conduction : 9.30  
iswo valence : 17.21  
formation : -2.52  
stability : -0.05  
0.5 0.1 0.01 1.0  
Sn0.29Zr0.71 -2.1996567427089353  
Sn0.29Zr0.71 -2.199656774373863  
Sn0.29Zr0.71 -2.1996567871823736  
Sn0.29Zr0.71 -2.1996567891989094  
Sn0.29Zr0.71 -2.1996568032290735  
Sn0.29Zr0.71 -2.199656817301824  
gap : 2.56  
iswo conduction : 15.64  
iswo valence : 12.53  
formation : -3.64  
stability : -0.27  
0.5 0.1 0.01 1.5  
Sn0.20Zr0.80 -4.07861238026275  
Sn0.20Zr0.80 -4.078612429710845  
gap : 2.74  
iswo conduction : 18.11  
iswo valence : 15.29  
formation : -3.86  
stability : -0.20  
0.5 0.1 0.02 0.0  
Al0.02Ga0.10In0.71Mg0.16 0.035981894636108236  
Al0.02Ga0.10In0.71Mg0.16 0.03598186211759946  
Al0.02Ga0.10In0.71Mg0.16 0.03598185148259159  
Al0.02Ga0.10In0.71Mg0.16 0.03598183050693837  
Al0.02Ga0.10In0.71Mg0.16 0.03598182590400567  
Al0.02Ga0.10In0.71Mg0.16 0.03598181312645188  
gap : 2.50  
iswo conduction : 5.61  
iswo valence : 26.24  
formation : -0.14  
stability : 0.04  
0.5 0.1 0.02 0.5  
Al0.79Sn0.21 -0.6637734897142203  
Al0.79Sn0.21 -0.663773523639877  
Al0.79Sn0.21 -0.6637735238810398

Al<sub>0.79</sub>Sn<sub>0.21</sub> -0.66377363486548  
gap : 2.63  
iswo conduction : 9.28  
iswo valence : 17.28  
formation : -2.53  
stability : -0.05  
0.5 0.1 0.02 1.0  
Sn<sub>0.27</sub>Zr<sub>0.73</sub> -2.3281079630941814  
Sn<sub>0.27</sub>Zr<sub>0.73</sub> -2.3281079655348176  
Sn<sub>0.27</sub>Zr<sub>0.73</sub> -2.328107996387274  
gap : 2.60  
iswo conduction : 16.24  
iswo valence : 13.18  
formation : -3.70  
stability : -0.25  
0.5 0.1 0.02 1.5  
Sn<sub>0.18</sub>Zr<sub>0.82</sub> -4.2353030379170775  
Sn<sub>0.18</sub>Zr<sub>0.82</sub> -4.23530305612128  
Sn<sub>0.18</sub>Zr<sub>0.82</sub> -4.235303058028784  
Sn<sub>0.18</sub>Zr<sub>0.82</sub> -4.235303058779923  
Sn<sub>0.18</sub>Zr<sub>0.82</sub> -4.235303059303547  
Sn<sub>0.18</sub>Zr<sub>0.82</sub> -4.235305640633477  
gap : 2.79  
iswo conduction : 18.77  
iswo valence : 16.07  
formation : -3.92  
stability : -0.18  
0.5 0.2 0.01 0.0  
Ga<sub>0.10</sub>In<sub>0.64</sub>Mg<sub>0.14</sub>Zn<sub>0.13</sub> 0.8409778702329669  
Al<sub>0.02</sub>Mg<sub>0.37</sub>Zn<sub>0.60</sub> 0.7923520037536482  
Al<sub>0.02</sub>Mg<sub>0.37</sub>Zn<sub>0.60</sub> 0.792351879589624  
Al<sub>0.02</sub>Mg<sub>0.37</sub>Zn<sub>0.60</sub> 0.7923517966949499  
gap : 2.61  
iswo conduction : 4.98  
iswo valence : 21.60  
formation : -0.41  
stability : -0.05  
0.5 0.2 0.01 0.5  
Al<sub>0.48</sub>Mg<sub>0.24</sub>Sn<sub>0.28</sub> 0.33287588097326926  
Al<sub>0.48</sub>Mg<sub>0.24</sub>Sn<sub>0.28</sub> 0.3328756963825823  
Al<sub>0.48</sub>Mg<sub>0.24</sub>Sn<sub>0.28</sub> 0.3328756599611671  
Al<sub>0.48</sub>Mg<sub>0.24</sub>Sn<sub>0.28</sub> 0.3328756452058641  
Al<sub>0.48</sub>Mg<sub>0.24</sub>Sn<sub>0.28</sub> 0.33287525948478813  
gap : 2.71  
iswo conduction : 7.51  
iswo valence : 16.75  
formation : -2.09  
stability : -0.11  
0.5 0.2 0.01 1.0  
Al<sub>0.80</sub>Sn<sub>0.20</sub> -0.8325502514590333  
Al<sub>0.80</sub>Sn<sub>0.20</sub> -0.8325502568760241  
Al<sub>0.80</sub>Sn<sub>0.20</sub> -0.8325505118963801  
gap : 2.71  
iswo conduction : 9.18  
iswo valence : 17.55  
formation : -2.54  
stability : -0.05  
0.5 0.2 0.01 1.5  
Sn<sub>0.36</sub>Zr<sub>0.64</sub> -2.5049630883926324  
gap : 2.42  
iswo conduction : 13.86  
iswo valence : 10.74  
formation : -3.45  
stability : -0.32

0.5 0.2 0.02 0.0  
Al0.02Mg0.41Zn0.57 0.5749019667834305  
Al0.02Mg0.41Zn0.57 0.5749019611317607  
gap : 2.62  
iswo conduction : 4.99  
iswo valence : 21.90  
formation : -0.46  
stability : -0.04  
0.5 0.2 0.02 0.5  
Al0.13Mg0.81Sb0.06 0.12566894204163215  
gap : 2.89  
iswo conduction : 6.20  
iswo valence : 27.75  
formation : -1.42  
stability : 0.04  
0.5 0.2 0.02 1.0  
Al0.80Sn0.19 -1.008428867902223  
Al0.80Sn0.19 -1.008428893683202  
Al0.80Sn0.19 -1.0084288945755147  
Al0.80Sn0.19 -1.0084289014306123  
Al0.80Sn0.19 -1.0084292621393858  
Al0.80Sn0.19 -1.008429600065921  
Al0.80Sn0.19 -1.0084296884381954  
gap : 2.73  
iswo conduction : 9.19  
iswo valence : 17.62  
formation : -2.55  
stability : -0.05  
0.5 0.2 0.02 1.5  
Sn0.34Zr0.66 -2.613671743065199  
gap : 2.44  
iswo conduction : 14.15  
iswo valence : 11.01  
formation : -3.48  
stability : -0.31  
0.75 0.1 0.01 0.0  
Ga0.11In0.45Mg0.27Zn0.16 0.28882937233138317  
Al0.03Ga0.04Mg0.42Zn0.51 0.2618658659933507  
Al0.03Ga0.04Mg0.42Zn0.51 0.2618657282186357  
gap : 2.81  
iswo conduction : 4.82  
iswo valence : 22.39  
formation : -0.56  
stability : -0.06  
0.75 0.1 0.01 0.5  
Al0.79Mg0.03Sn0.18 -0.5483122772101232  
Al0.79Mg0.03Sn0.18 -0.5483122868247011  
Al0.79Mg0.03Sn0.18 -0.548312289716524  
gap : 2.87  
iswo conduction : 8.86  
iswo valence : 18.09  
formation : -2.53  
stability : -0.06  
0.75 0.1 0.01 1.0  
Sn0.21Zr0.79 -2.205454382323347  
Sn0.21Zr0.79 -2.205454382365028  
Sn0.21Zr0.79 -2.205454383026409  
Sn0.21Zr0.79 -2.2054543873556205  
gap : 2.72  
iswo conduction : 17.78  
iswo valence : 14.91  
formation : -3.84  
stability : -0.21  
0.75 0.1 0.01 1.5

Sn0.14Zr0.86 -4.172863739959609  
Sn0.14Zr0.86 -4.172863747025374  
gap : 2.89  
iswo conduction : 20.17  
iswo valence : 17.77  
formation : -4.02  
stability : -0.14  
0.75 0.1 0.02 0.0  
Al0.04Ga0.08In0.54Mg0.30Zn0.04 0.03089708491781007  
Al0.04Ga0.08In0.54Mg0.30Zn0.04 0.030897066147116403  
Al0.04Ga0.08In0.54Mg0.30Zn0.04 0.030897063389623725  
Al0.04Ga0.08In0.54Mg0.30Zn0.04 0.03089705991558256  
Al0.04Ga0.08In0.54Mg0.30Zn0.04 0.0308970509053641  
gap : 2.77  
iswo conduction : 5.60  
iswo valence : 26.49  
formation : -0.40  
stability : 0.05  
0.75 0.1 0.02 0.5  
Ag0.07Al0.93 -0.7184344128217588  
Al0.79Mg0.03Sn0.18 -0.7296550054388857  
Al0.79Mg0.02Sn0.18 -0.7296552757835442  
Al0.79Mg0.03Sn0.18 -0.7296554417667455  
Al0.79Mg0.03Sn0.18 -0.7296554805660265  
Al0.79Mg0.03Sn0.18 -0.7296555486045032  
Al0.79Mg0.02Sn0.18 -0.7296557747319453  
gap : 2.88  
iswo conduction : 8.90  
iswo valence : 18.17  
formation : -2.55  
stability : -0.05  
0.75 0.1 0.02 1.0  
Sn0.19Zr0.81 -2.358992188811368  
gap : 2.77  
iswo conduction : 18.56  
iswo valence : 15.81  
formation : -3.90  
stability : -0.19  
0.75 0.1 0.02 1.5  
Sn0.12Zr0.88 -4.3549859178793  
gap : 2.94  
iswo conduction : 20.88  
iswo valence : 18.65  
formation : -4.07  
stability : -0.12  
0.75 0.2 0.01 0.0  
Al0.03Ga0.06Mg0.38Zn0.52 0.740824118731755  
Al0.03Ga0.06Mg0.38Zn0.52 0.7408240747209744  
Al0.03Ga0.06Mg0.38Zn0.52 0.7408227897342732  
Al0.03Ga0.06Mg0.38Zn0.52 0.7408207959976588  
gap : 2.85  
iswo conduction : 4.76  
iswo valence : 22.19  
formation : -0.54  
stability : -0.08  
0.75 0.2 0.01 0.5  
Al0.46Mg0.31Sn0.23 0.22349423440531546  
Al0.17Mg0.79Sb0.04 0.21408777093826892  
Al0.17Mg0.79Sb0.04 0.21408776850990807  
Al0.17Mg0.79Sb0.04 0.2140876928827553  
Al0.17Mg0.79Sb0.04 0.21408721258777175  
gap : 3.12  
iswo conduction : 5.76  
iswo valence : 28.11

formation : -1.59  
stability : -0.02  
0.75 0.2 0.01 1.0  
Al0.77Mg0.05Sn0.18 -0.9390987755445199  
Al0.77Mg0.05Sn0.18 -0.9390989021015665  
Al0.77Mg0.05Sn0.18 -0.9390992625692312  
Al0.77Mg0.05Sn0.18 -0.9390993273596215  
gap : 2.97  
iswo conduction : 8.59  
iswo valence : 18.45  
formation : -2.52  
stability : -0.06  
0.75 0.2 0.01 1.5  
Sn0.31Zr0.69 -2.4271127360229765  
Sn0.31Zr0.69 -2.42711274165798  
Sn0.31Zr0.69 -2.4271127417363663  
gap : 2.52  
iswo conduction : 15.15  
iswo valence : 12.02  
formation : -3.59  
stability : -0.28  
0.75 0.2 0.02 0.0  
Ga0.12In0.40Mg0.30Zn0.19 0.5759544922245876  
Ga0.12In0.40Mg0.30Zn0.19 0.5759544236496  
Al0.02Ga0.06Mg0.42Zn0.49 0.5172917871596776  
gap : 2.86  
iswo conduction : 4.77  
iswo valence : 22.52  
formation : -0.58  
stability : -0.07  
0.75 0.2 0.02 0.5  
Al0.16Mg0.80Sb0.04 -0.06769201567358862  
Al0.16Mg0.80Sb0.04 -0.06769203804591573  
Al0.16Mg0.80Sb0.04 -0.06769211965770605  
gap : 3.13  
iswo conduction : 5.75  
iswo valence : 28.24  
formation : -1.60  
stability : -0.03  
0.75 0.2 0.02 1.0  
Al0.77Mg0.05Sn0.18 -1.1240095891389414  
Al0.77Mg0.05Sn0.18 -1.1240098887766579  
Al0.77Mg0.05Sn0.18 -1.1240109454237222  
Al0.77Mg0.05Sn0.18 -1.124011626135546  
gap : 2.99  
iswo conduction : 8.57  
iswo valence : 18.53  
formation : -2.52  
stability : -0.06  
0.75 0.2 0.02 1.5  
Al0.84Sn0.16 -2.4248659209372807  
Sn0.29Zr0.71 -2.5493369802913897  
Sn0.29Zr0.71 -2.5493370144170897  
Sn0.29Zr0.71 -2.5493370174739565  
Sn0.29Zr0.71 -2.5493370175530137  
Sn0.29Zr0.71 -2.549337110986845  
Sn0.29Zr0.71 -2.549340523202282  
gap : 2.55  
iswo conduction : 15.54  
iswo valence : 12.43  
formation : -3.63  
stability : -0.27  
1 0.1 0.01 0.0  
Al0.04Ga0.09Mg0.43Zn0.43 0.2342907514393039

Al0.04Ga0.09Mg0.43Zn0.43 0.2342901272609481  
gap : 3.05  
iswo conduction : 4.62  
iswo valence : 23.02  
formation : -0.72  
stability : -0.09  
1 0.1 0.01 0.5  
Al0.75Mg0.08Sn0.17 -0.6076572091293975  
gap : 3.12  
iswo conduction : 8.23  
iswo valence : 19.05  
formation : -2.51  
stability : -0.07  
1 0.1 0.01 1.0  
Sn0.14Zr0.86 -2.1699349109992614  
Sn0.14Zr0.86 -2.169934995493538  
Sn0.14Zr0.86 -2.1699349962065053  
Sn0.14Zr0.86 -2.1699350228877052  
Sn0.14Zr0.86 -2.1699350290023394  
gap : 2.90  
iswo conduction : 20.26  
iswo valence : 17.88  
formation : -4.03  
stability : -0.14  
1 0.1 0.01 1.5  
Sn0.08Zr0.92 -4.222775773079165  
Sn0.08Zr0.92 -4.222775836077663  
Sn0.08Zr0.92 -4.22277591866991  
Sn0.08Zr0.92 -4.2227759247561325  
Sn0.08Zr0.92 -4.222775925050442  
Sn0.08Zr0.92 -4.22277592648236  
gap : 3.06  
iswo conduction : 22.38  
iswo valence : 20.57  
formation : -4.17  
stability : -0.08  
1 0.1 0.02 0.0  
Al0.07Mg0.59Zn0.34 -0.0015791270918306677  
Al0.07Mg0.59Zn0.34 -0.0015791643413713974  
gap : 3.07  
iswo conduction : 4.79  
iswo valence : 24.30  
formation : -1.02  
stability : -0.10  
1 0.1 0.02 0.5  
Ag0.02Al0.23Mg0.75 -0.8176065808997205  
Ag0.02Al0.23Mg0.75 -0.81760659517433  
gap : 3.26  
iswo conduction : 6.12  
iswo valence : 29.01  
formation : -1.83  
stability : -0.13  
1 0.1 0.02 1.0  
gap : 2.96  
iswo conduction : 21.13  
iswo valence : 18.96  
formation : -4.09  
stability : -0.12  
1 0.1 0.02 1.5  
Sn0.06Zr0.94 -4.433086899340425  
Sn0.06Zr0.94 -4.433086912527972  
Sn0.06Zr0.94 -4.4330869212628015  
Sn0.06Zr0.94 -4.4330869213843345  
Sn0.06Zr0.94 -4.43308692378341

Sn0.06Zr0.94 -4.433087542957352  
Sn0.06Zr0.94 -4.433087930942776  
gap : 3.12  
iswo conduction : 23.08  
iswo valence : 21.49  
formation : -4.22  
stability : -0.07  
1 0.2 0.01 0.0  
Al0.05Ga0.11Mg0.39Zn0.45 0.6926440492881674  
Al0.05Ga0.11Mg0.39Zn0.45 0.6926432777728493  
Al0.05Ga0.11Mg0.39Zn0.45 0.6926424166867793  
Al0.05Ga0.11Mg0.39Zn0.45 0.6926424000737751  
gap : 3.09  
iswo conduction : 4.56  
iswo valence : 22.77  
formation : -0.69  
stability : -0.10  
1 0.2 0.01 0.5  
Al0.20Mg0.78Sb0.02 0.02931249777228606  
Al0.20Mg0.78Sb0.02 0.02931243888994217  
Al0.20Mg0.78Sb0.02 0.029310740874692875  
gap : 3.37  
iswo conduction : 5.33  
iswo valence : 28.62  
formation : -1.77  
stability : -0.09  
1 0.2 0.01 1.0  
gap : 3.23  
iswo conduction : 7.95  
iswo valence : 19.50  
formation : -2.50  
stability : -0.08  
1 0.2 0.01 1.5  
gap : 3.24  
iswo conduction : 8.87  
iswo valence : 19.46  
formation : -2.66  
stability : -0.03  
1 0.2 0.02 0.0  
Al0.05Ga0.09Mg0.44Zn0.42 0.46312796556663044  
Al0.05Ga0.09Mg0.44Zn0.42 0.46312786492991453  
Al0.05Ga0.09Mg0.44Zn0.42 0.4631275228447868  
Al0.05Ga0.09Mg0.44Zn0.42 0.4631260820110994  
Al0.05Ga0.09Mg0.44Zn0.42 0.46312593479601954  
gap : 3.10  
iswo conduction : 4.58  
iswo valence : 23.15  
formation : -0.76  
stability : -0.10  
1 0.2 0.02 0.5  
Al0.19Mg0.79Sb0.01 -0.25745078017532363  
Al0.19Mg0.79Sb0.01 -0.25745252284531417  
gap : 3.38  
iswo conduction : 5.33  
iswo valence : 28.73  
formation : -1.78  
stability : -0.10  
1 0.2 0.02 1.0  
Al0.73Mg0.12Sn0.15 -1.2461569486910222  
Al0.73Mg0.12Sn0.15 -1.2461572537639263  
Al0.73Mg0.12Sn0.15 -1.2461572711104596  
Al0.73Mg0.12Sn0.15 -1.246158937955896  
gap : 3.25  
iswo conduction : 7.88

```

iswo valence      : 19.60
formation         : -2.49
stability         : -0.08
1 0.2 0.02 1.5
Al0.87Sn0.13 -2.5547182205272305
Al0.87Sn0.13 -2.554718221911564
Al0.87Sn0.13 -2.5547182227016543
Al0.87Sn0.13 -2.5547189770038448
Al0.87Sn0.13 -2.5547215952955247
gap               : 3.25
iswo conduction  : 8.86
iswo valence     : 19.51
formation         : -2.67
stability         : -0.03

```

In [35]:

```

from itertools import combinations
#elems_for_test = ['In', 'Ga', 'Zn', 'Mg', 'Al']
elems_for_test = ['Ag', 'Al', 'Cd', 'Ga', 'In', 'Mg', 'Sb', 'Sn', 'Si', 'Ti', 'Zn',
#elems_for_test = ['Al', 'Cd', 'Ga', 'In', 'Mg', 'Sb', 'Sn', 'Si', 'Zn']

degree = 10
epsilon = 0.001
C=400
kernel='poly'

data = {}

for pair in combinations(elems_for_test, 2):
    df_pair = df[1 - abs(df[pair[0]] + df[pair[1]]) < 0.0001 ]
    if pair[0] == 0 or pair[1] == 0:
        continue
    data[pair] = {}
    for observable in ['transport_gap', 'dissociation_energy_per_O', 'mean_iswo_cond
        mads = []
        for c, df_test in df_pair.groupby('composition'):
            df_training = df_pair[df_pair['composition'] != c]
            model = get_model(df_training, observable, SVR, kernel=kernel, C=C, gamm
                epsilon=epsilon, coef0=1, for_cv=True)
            data_org = df_test[observable]
            data_predicted = model.predict(list(df_test['descriptor']))
            diff = abs(data_predicted - data_org)
            # print(c, np.mean(diff))
            mads.append(np.mean(diff))
        data[pair][observable] =np.mean(mads)
cv_df = pd.DataFrame(data).T
cv_df

```

Out[35]:

|           | transport_gap | dissociation_energy_per_O | mean_iswo_cond | mean_iswo_val |      |
|-----------|---------------|---------------------------|----------------|---------------|------|
| <b>Ag</b> | <b>Al</b>     | 1.33                      | 0.52           | 4.98          | 1.39 |
|           | <b>Cd</b>     | 0.05                      | 0.23           | 1.30          | 1.91 |
|           | <b>Ga</b>     | 1.11                      | 0.43           | 6.74          | 1.85 |
|           | <b>In</b>     | 0.39                      | 0.61           | 4.01          | 2.07 |
|           | <b>Mg</b>     | 0.66                      | 0.04           | 3.39          | 2.32 |
|           | <b>Sb</b>     | 0.29                      | 0.58           | 1.09          | 2.24 |
|           | <b>Sn</b>     | 0.16                      | 0.27           | 1.17          | 2.82 |
|           | <b>Si</b>     | 0.37                      | 1.25           | 1.64          | 1.66 |



|           |           | transport_gap | dissociation_energy_per_O | mean_iswo_cond | mean_iswo_val |
|-----------|-----------|---------------|---------------------------|----------------|---------------|
|           | <b>Ti</b> | 0.69          | 1.22                      | 4.48           | 2.73          |
|           | <b>Zn</b> | 0.41          | 0.06                      | 2.67           | 1.08          |
|           | <b>Zr</b> | 0.56          | 0.07                      | 0.89           | 1.71          |
| <b>Al</b> | <b>Cd</b> | 0.51          | 0.31                      | 1.96           | 2.13          |
|           | <b>Ga</b> | 0.55          | 0.16                      | 1.13           | 1.52          |
|           | <b>In</b> | 0.40          | 0.14                      | 0.72           | 1.66          |
|           | <b>Mg</b> | 0.61          | 0.12                      | 0.54           | 1.55          |
|           | <b>Sb</b> | 0.52          | 0.47                      | 1.85           | 2.79          |
|           | <b>Sn</b> | 0.38          | 0.39                      | 1.24           | 4.28          |
|           | <b>Si</b> | 0.34          | 0.05                      | 0.92           | 1.81          |
|           | <b>Ti</b> | 0.73          | 0.05                      | 6.22           | 0.95          |
|           | <b>Zn</b> | 0.41          | 0.08                      | 0.61           | 1.06          |
|           | <b>Zr</b> | 0.31          | 0.06                      | 6.61           | 1.49          |
| <b>Cd</b> | <b>Ga</b> | 0.26          | 0.41                      | 1.92           | 1.89          |
|           | <b>In</b> | 0.24          | 0.09                      | 1.42           | 1.82          |
|           | <b>Mg</b> | 0.48          | 0.05                      | 3.29           | 0.92          |
|           | <b>Sb</b> | 0.47          | 0.65                      | 1.23           | 2.21          |
|           | <b>Sn</b> | 0.36          | 0.31                      | 1.15           | 2.85          |
|           | <b>Si</b> | 0.87          | 0.43                      | 2.57           | 1.68          |
|           | <b>Ti</b> | 0.49          | 0.32                      | 2.53           | 2.74          |
|           | <b>Zn</b> | 0.44          | 0.06                      | 1.71           | 0.85          |
|           | <b>Zr</b> | 0.28          | 0.19                      | 2.13           | 1.53          |
| <b>Ga</b> | <b>In</b> | 0.31          | 0.10                      | 0.45           | 1.16          |
|           | <b>Mg</b> | 0.35          | 0.05                      | 0.53           | 1.75          |
|           | <b>Sb</b> | 0.47          | 0.46                      | 0.89           | 2.17          |
|           | <b>Sn</b> | 0.34          | 0.29                      | 0.88           | 2.90          |
|           | <b>Si</b> | 0.34          | 0.08                      | 1.30           | 2.03          |
|           | <b>Ti</b> | 0.38          | 0.15                      | 3.79           | 1.41          |
|           | <b>Zn</b> | 0.24          | 0.09                      | 0.44           | 0.96          |
|           | <b>Zr</b> | 0.34          | 0.16                      | 1.57           | 1.55          |
| <b>In</b> | <b>Mg</b> | 0.24          | 0.06                      | 0.42           | 1.36          |
|           | <b>Sb</b> | 0.65          | 0.85                      | 0.98           | 4.56          |
|           | <b>Sn</b> | 0.50          | 0.39                      | 0.58           | 5.79          |
|           | <b>Si</b> | 0.36          | 0.08                      | 1.71           | 2.27          |
|           | <b>Ti</b> | 0.20          | 0.05                      | 5.90           | 1.05          |
|           | <b>Zn</b> | 0.18          | 0.07                      | 0.42           | 1.24          |

|           |           | transport_gap | dissociation_energy_per_O | mean_iswo_cond | mean_iswo_val |
|-----------|-----------|---------------|---------------------------|----------------|---------------|
|           | <b>Zr</b> | 0.44          | 0.10                      | 1.51           | 0.83          |
| <b>Mg</b> | <b>Sb</b> | 0.39          | 0.49                      | 1.12           | 3.30          |
|           | <b>Sn</b> | 0.41          | 0.34                      | 0.96           | 4.79          |
|           | <b>Si</b> | 0.27          | 0.06                      | 0.87           | 2.12          |
|           | <b>Ti</b> | 0.36          | 0.12                      | 6.22           | 1.36          |
|           | <b>Zn</b> | 0.39          | 0.11                      | 0.57           | 1.42          |
|           | <b>Zr</b> | 0.31          | 0.08                      | 1.62           | 2.48          |
| <b>Sb</b> | <b>Sn</b> | 0.41          | 0.53                      | 0.79           | 3.20          |
|           | <b>Si</b> | 0.76          | 0.75                      | 1.75           | 2.37          |
|           | <b>Ti</b> | 0.59          | 0.71                      | 4.39           | 3.53          |
|           | <b>Zn</b> | 0.58          | 0.78                      | 1.45           | 2.78          |
|           | <b>Zr</b> | 0.52          | 0.62                      | 2.12           | 2.67          |
| <b>Sn</b> | <b>Si</b> | 0.27          | 0.32                      | 1.65           | 2.83          |
|           | <b>Ti</b> | 0.45          | 0.45                      | 1.29           | 5.40          |
|           | <b>Zn</b> | 0.44          | 0.49                      | 0.52           | 6.24          |
|           | <b>Zr</b> | 0.37          | 0.33                      | 1.43           | 3.43          |
| <b>Si</b> | <b>Ti</b> | 1.00          | 0.19                      | 5.67           | 1.78          |
|           | <b>Zn</b> | 0.29          | 0.06                      | 1.01           | 1.30          |
|           | <b>Zr</b> | 0.51          | 0.09                      | 3.89           | 1.86          |
| <b>Ti</b> | <b>Zn</b> | 0.20          | 0.08                      | 4.72           | 1.02          |
|           | <b>Zr</b> | 0.18          | 0.04                      | 2.91           | 1.30          |
| <b>Zn</b> | <b>Zr</b> | 0.39          | 0.11                      | 1.99           | 1.08          |

In [36]: `cv_df.describe()`

Out[36]:

|              | transport_gap | dissociation_energy_per_O | mean_iswo_cond | mean_iswo_val |
|--------------|---------------|---------------------------|----------------|---------------|
| <b>count</b> | 66.00         | 66.00                     | 66.00          | 66.00         |
| <b>mean</b>  | 0.44          | 0.29                      | 2.13           | 2.19          |
| <b>std</b>   | 0.22          | 0.28                      | 1.73           | 1.18          |
| <b>min</b>   | 0.05          | 0.04                      | 0.42           | 0.83          |
| <b>25%</b>   | 0.31          | 0.08                      | 0.93           | 1.39          |
| <b>50%</b>   | 0.39          | 0.17                      | 1.48           | 1.86          |
| <b>75%</b>   | 0.51          | 0.45                      | 2.64           | 2.74          |
| <b>max</b>   | 1.33          | 1.25                      | 6.74           | 6.24          |

## validation of the Mg-Zn-Al system

```
In [37]: with open('MgZnAlO.json', 'r') as f:
          MgZnAl_data = json.load(f)

          ens = []

          for x in MgZnAl_data:
              energy = MgZnAl_data[x].get('total_energy_per_0', None)
              comp = MgZnAl_data[x].get('composition')
              ens.append([x, energy, comp])

          selected = []

          for name, group in pd.DataFrame(ens).groupby(by=2):
              selected += list(group.sort_values(by=1).head(3)[0])
```

```
In [38]: model_ef, model_ic, model_iv, model_g = [], [], [], []
          calc_ef, calc_ic, calc_iv, calc_g = [], [], [], []
          al, mg, zn = [], [], []

          for x in selected:
              # print(MgZnAl_data[x]['Zn'], MgZnAl_data[x]['Mg'], MgZnAl_data[x]['Al'])
              v = [0]*len(elems)
              for el in ['Zn', 'Mg', 'Al']:
                  v[elems.index(el)] = MgZnAl_data[x][el]

              # print(v)
              # print(formation_model.predict([v])[0], iswo_cond_model.predict([v])[0], iswo_val_model.predict([v])[0])
              # print(MgZnAl_data[x]['dissociation_energy_per_0'], MgZnAl_data[x]['mean_iswo_cond'], MgZnAl_data[x]['mean_iswo_val'], MgZnAl_data[x]['transport_gap'])
              model_ef.append(formation_model.predict([v])[0])
              model_ic.append(iswo_cond_model.predict([v])[0])
              model_iv.append(iswo_val_model.predict([v])[0])
              model_g.append(gap_model.predict([v])[0])
              al.append(MgZnAl_data[x]['Al'])
              mg.append(MgZnAl_data[x]['Mg'])
              zn.append(MgZnAl_data[x]['Zn'])
              calc_ef.append(MgZnAl_data[x]['dissociation_energy_per_0'])
              calc_ic.append(MgZnAl_data[x]['mean_iswo_cond'])
              calc_iv.append(MgZnAl_data[x]['mean_iswo_val'])
              calc_g.append(MgZnAl_data[x]['transport_gap'])
```

```
In [39]: fig, ax = plt.subplots()
          p = ax.scatter(calc_ef, model_ef, c=al)
          mi = min(calc_ef + model_ef) * 0.95
          ma = max(calc_ef + model_ef) * 1.05
          ax.plot([-5,30], [-5,30], c = 'k')
          ax.set_xlim(mi, ma)
          ax.set_ylim(mi, ma)
          ax.set_title('Ef')
          ax.set_xlabel('Computed values', size=12)
          ax.set_ylabel('Model values', size=12)
          cb = fig.colorbar(p, ax=ax)
          cb.set_label('Fraction of Al', size=12)
```

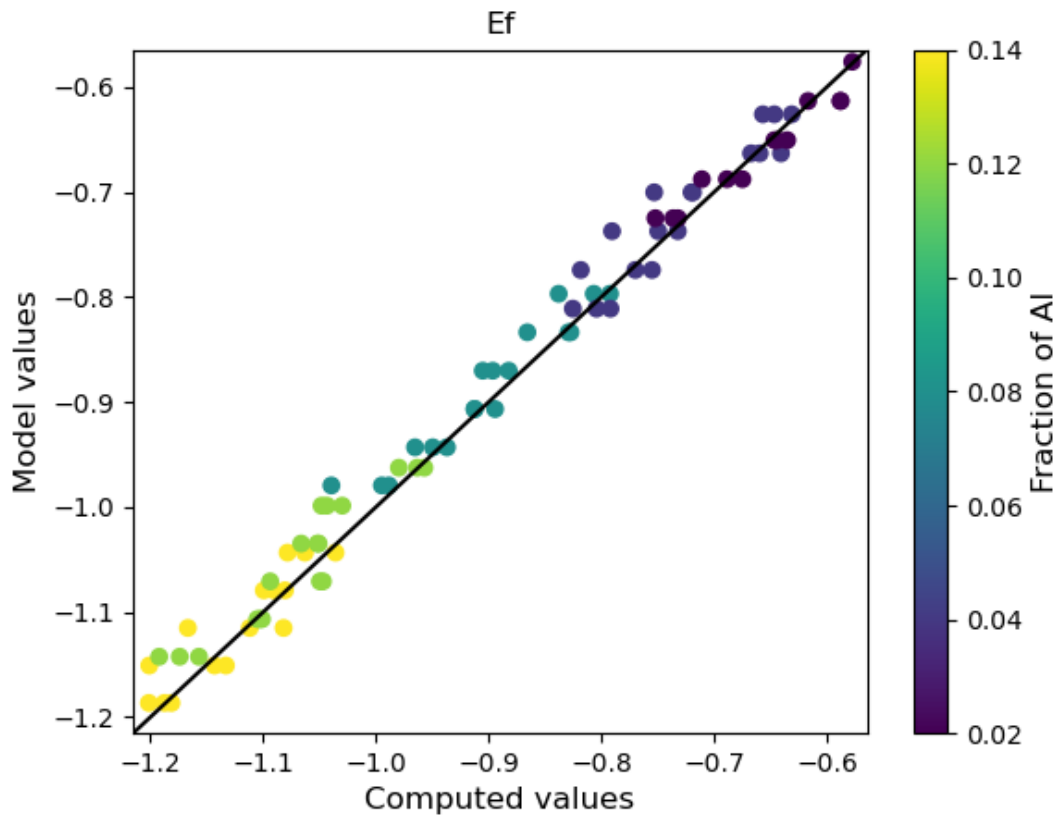

In [40]:

```
fig, ax = plt.subplots()
p = ax.scatter(calc_g, model_g, c=al)

mi = min(calc_g + model_g) * 0.95
ma = max(calc_g + model_g) * 1.05
ax.plot([-5,30], [-5,30], c = 'k')
ax.set_xlim(mi, ma)
ax.set_ylim(mi, ma)
ax.set_title('Gap')
ax.set_xlabel('Computed values', size=12)
ax.set_ylabel('Model values', size=12)
cb = fig.colorbar(p, ax=ax)
cb.set_label('Fraction of AI', size=12)
```

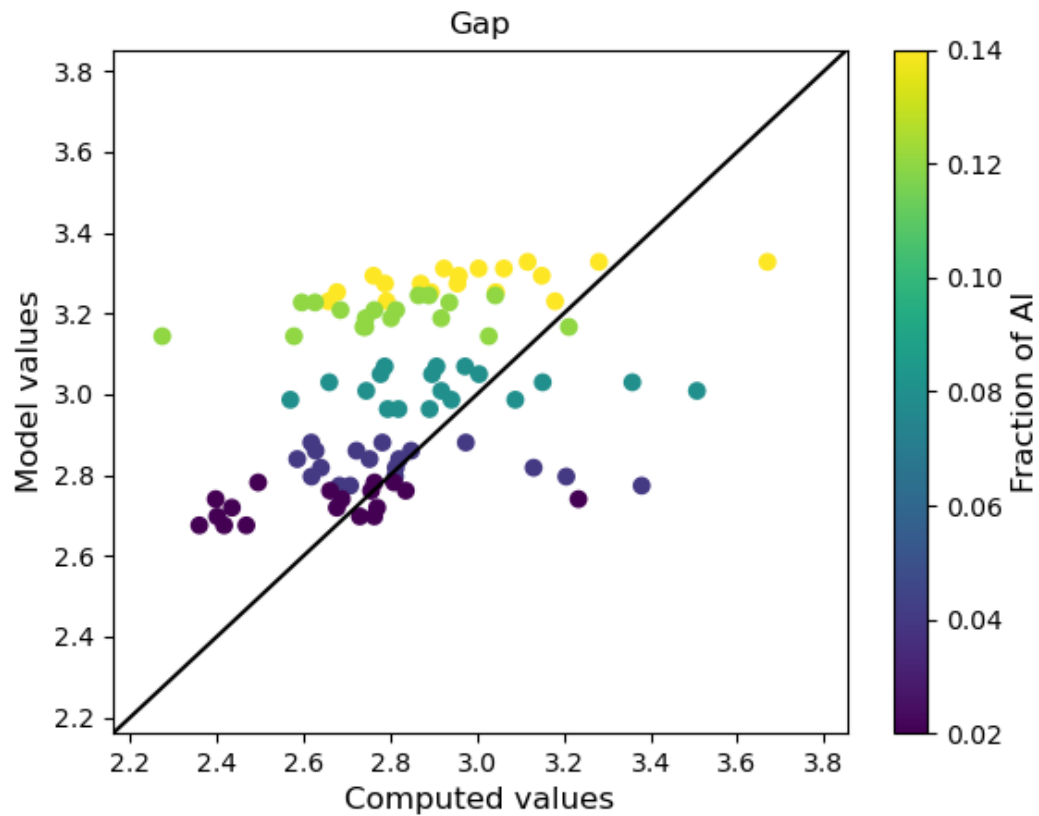

In [41]:

```
fig, ax = plt.subplots()
p = ax.scatter(calc_ic, model_ic, c=al)
mi = min(calc_ic + model_ic) * 0.95
ma = max(calc_ic + model_ic) * 1.05
ax.plot([-5,30], [-5,30], c = 'k')
ax.set_xlim(mi, ma)
ax.set_ylim(mi, ma)
ax.set_title('ISW0$\mathrm{C}$')
ax.set_xlabel('Computed values', size=12)
ax.set_ylabel('Model values', size=12)
cb = fig.colorbar(p, ax=ax)
cb.set_label('Fraction of AI', size=12)
```

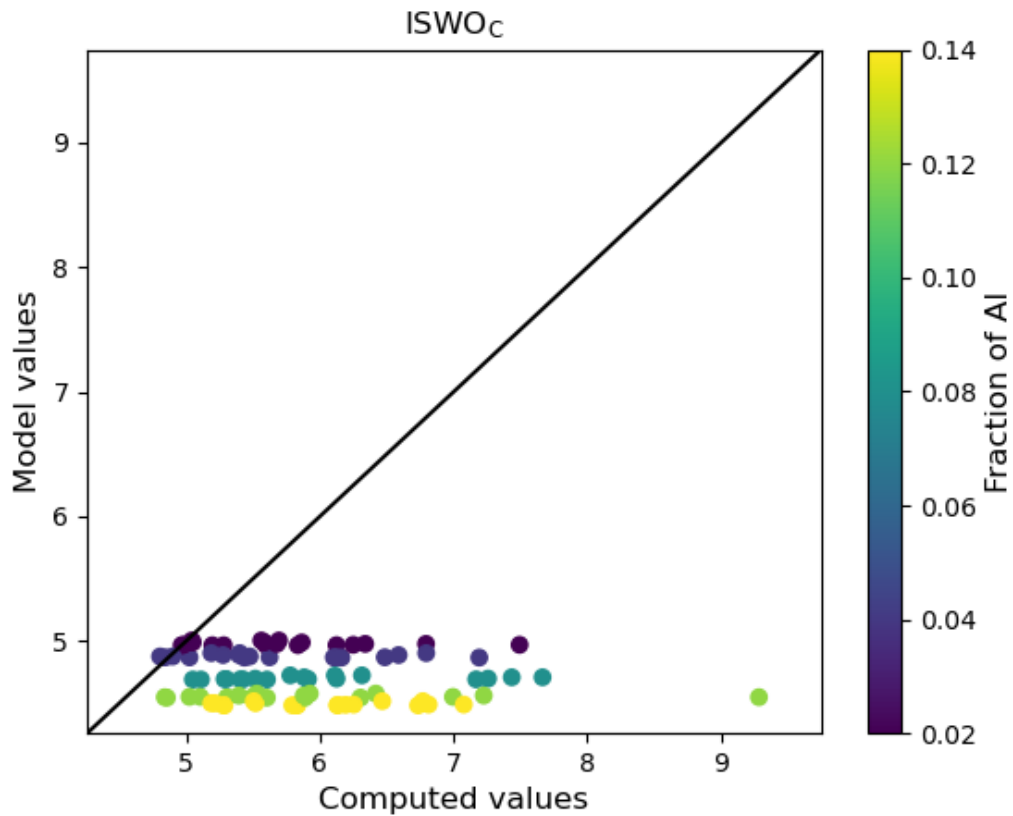

In [42]:

```
fig, ax = plt.subplots()
p = ax.scatter(calc_iv, model_iv, c=al)
mi = min(calc_iv + model_iv) * 0.95
ma = max(calc_iv + model_iv) * 1.05
ax.plot([-5,30], [-5,30], c = 'k')
ax.set_xlim(mi, ma)
ax.set_ylim(mi, ma)
ax.set_title('ISWO $\mathrm{V}$ ')
ax.set_xlabel('Computed values', size=12)
ax.set_ylabel('Model values', size=12)
cb = fig.colorbar(p, ax=ax)
cb.set_label('Fraction of AI', size=12)
```

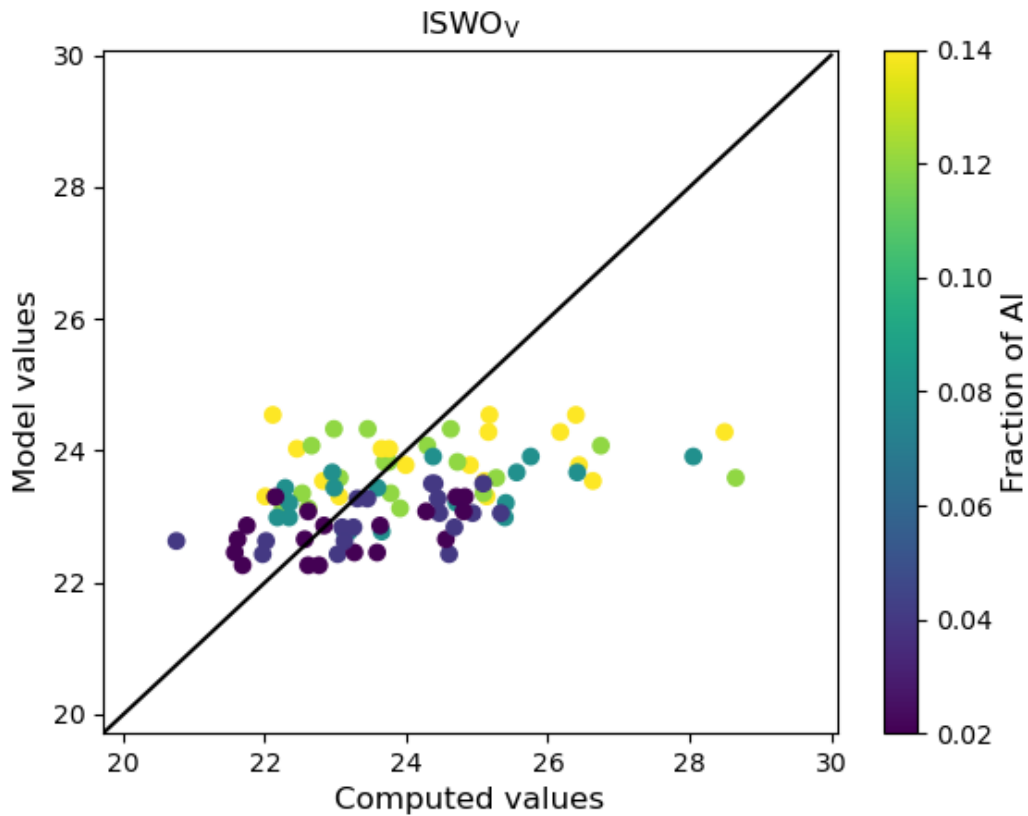

In [43]:

```
fig, ax = plt.subplots()
ax.plot([-5,30], [-5,30], c = 'k')
ax.scatter(calc_iv, model_iv, c=al, s=5)
ax.scatter(calc_ic, model_ic, c=al, s=5)
ax.scatter(calc_g, model_g, c=al, s=5)
p = ax.scatter(calc_ef, model_ef, c=al, s=5)
ax.set_xlabel('Computed values', size=12)
ax.set_ylabel('Model values', size=12)
ax.set_xlim(-4,29)
ax.set_ylim(-4,29)

mad_g = np.mean(np.abs(np.array(calc_g) - np.array(model_g)))
mad_iv = np.mean(np.abs(np.array(calc_iv) - np.array(model_iv)))
mad_ic = np.mean(np.abs(np.array(calc_ic) - np.array(model_ic)))
mad_ef = np.mean(np.abs(np.array(calc_ef) - np.array(model_ef)))

ax.annotate('ISWO$\mathrm{V}$' + f'\n (MAD {mad_iv:1.2f})', [21.5,18.5])
ax.annotate('ISWO$\mathrm{C}$' + f' (MAD {mad_ic:1.2f})', [10, 4.5])
ax.annotate('Gap' + f' (MAD {mad_g:1.2f})', [4.5, 2.0])
ax.annotate('$E\mathrm{f}$' + f' (MAD {mad_ef:1.2f})', [0.5,-1.0])
cb = fig.colorbar(p, ax=ax)
cb.set_label('Fraction of AI', size=12)
fig.savefig('validation.eps')
```

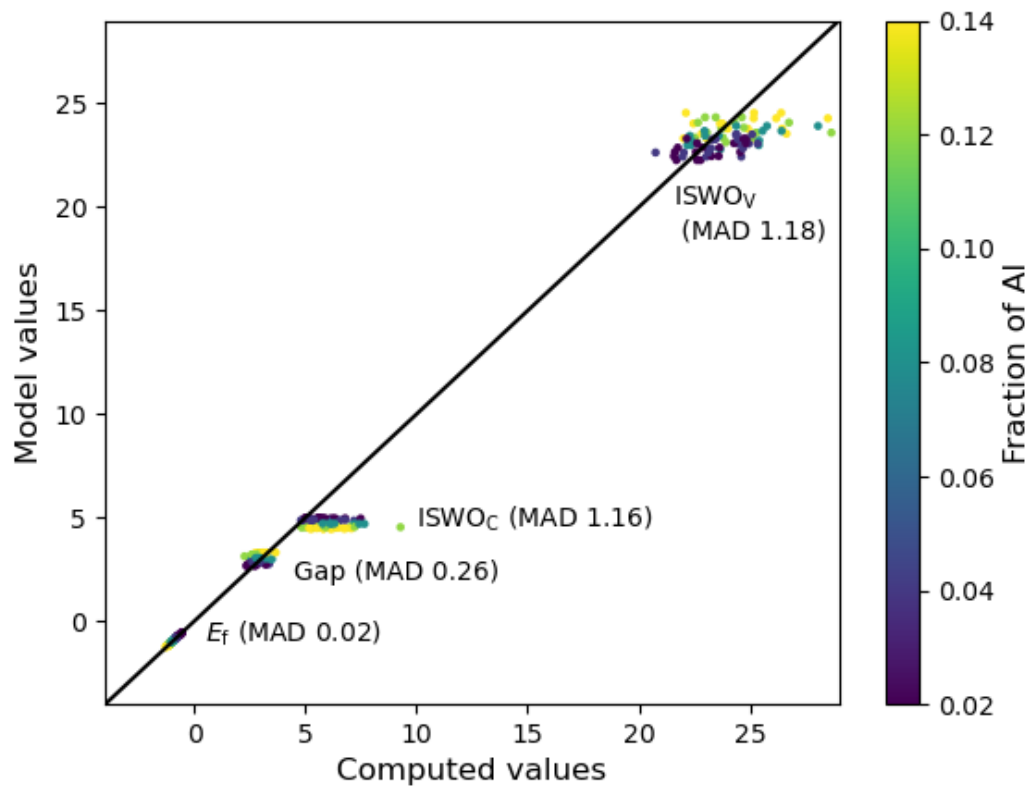

In [ ]:

In [ ]:
